# Supplementary material for: SWAT+MODFLOW: a new hydrologic model for simulating surface-subsurface flow in managed watersheds
Source: Copernicus journal article supplement (doi:10.5194/gmd-18-5681-2025), 2025-09-05
Supplement: Supplementary file 1 [file gmd-18-5681-2025-supplement.pdf]

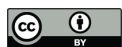

*Supplement of*

## **SWAT+MODFLOW: a new hydrologic model for simulating surface-subsurface flow in managed watersheds**

**Ryan T. Bailey et al.**

*Correspondence to:* Ryan T. Bailey ([rtbailey@colostate.edu](mailto:rtbailey@colostate.edu))

The copyright of individual parts of the supplement might differ from the article licence.

## Tutorial for SWAT+ MODFLOW

### **Professor Ryan Bailey**

Dept. of Civil and Environmental Engineering

Colorado State University

August 2025

Email: [rtbailey@colostate.edu](mailto:rtbailey@colostate.edu)

### **Introduction**

This tutorial guides the user through the preparation and simulation of a coupled SWAT+ MODFLOW hydrologic model. SWAT+ simulates land surface, soil, and channel hydro-chemical processes, whereas MODFLOW simulates aquifer hydrological processes. This tutorial has the following sections:

#### **S1. Overview of SWAT+ MODFLOW (p. 4)**

#### **S2. Geographic linkage between SWAT+ objects and MODFLOW grid**

S2.1 Recharge to water table and Groundwater → Soil transfer (p. 5-9)

S2.2 Groundwater ET (p. 10)

S2.3 Groundwater-channel exchange (p. 11-13)

S2.3 Groundwater pumping for irrigation and municipal demand (p. 14-15)

S2.5 Groundwater-canal exchange (p. 16-18)

S2.6 Groundwater-drain outflow (p. 19-20)

S2.7 Groundwater-reservoir exchange (p. 21)

#### **S3. Preparing and modifying SWAT+ and MODFLOW input files**

S3.1 Modification to SWAT+ files (p. 22)

S3.2 Modification to MODFLOW files (p. 23-28)

#### **S4. SWAT+MODFLOW code structure (p. 29)**

#### **S5. Running a SWAT+ MODFLOW simulation**

S5.1 Assemble model input files (p. 30)

S5.2 Run SWAT+MODFLOW simulation (p. 31-32)

S5.3 Troubleshooting (p. 33)

#### **S6. Viewing SWAT+ MODFLOW simulation results**

S6.1 SMRT output files (p. 34)

S6.2 Groundwater fluxes (p. 35-40)

S6.3 Groundwater head (p. 41)

#### **S7. Model calibration using PEST (p. 42-44)**

#### **S8. Global sensitivity analysis for SWAT+MODFLOW (p. 45-46)**

To use this tutorial, the user must have the following:

- Working SWAT+ model, with shape files for HRUs, channels, and subbasins.
- Working MODFLOW, with shape file for the grid.

Note: This tutorial references QGIS, a geographic information system software that is free and open-source, version 3.42.1-Münster.

The steps for linking, preparing all necessary input files, viewing results are provided using existing SWAT+ and MODFLOW models for the John Martin Reservoir (JMR) watershed, a 9,990 km<sup>2</sup> irrigated watershed within the Arkansas River Valley of southeastern Colorado. See maps on the next page. The JMR watershed has been irrigated for over 140 years, with irrigation being drawn from 1) the Arkansas River through an extensive network of earthen irrigation canals and 2) the underlying alluvial aquifer. There are 5,100 fields, the majority of which are irrigated. Both flood irrigation and sprinkler irrigation are practiced in the watershed. The following major hydrologic processes and fluxes occur in the watershed, and will be simulated using SWAT+ MODFLOW:

- Surface runoff from rainfall and irrigation
- Infiltration, deep percolation, and recharge
- Crop Evapotranspiration
- Streamflow in the Arkansas River and its tributaries
- Canal diversions from the Arkansas River
- Seepage from canals to the aquifer
- Groundwater pumping
- Subsurface tile drainage
- Groundwater-channel exchange along the Arkansas River and its tributaries
- Groundwater-reservoir exchange

John Martin Reservoir (JMR) watershed:

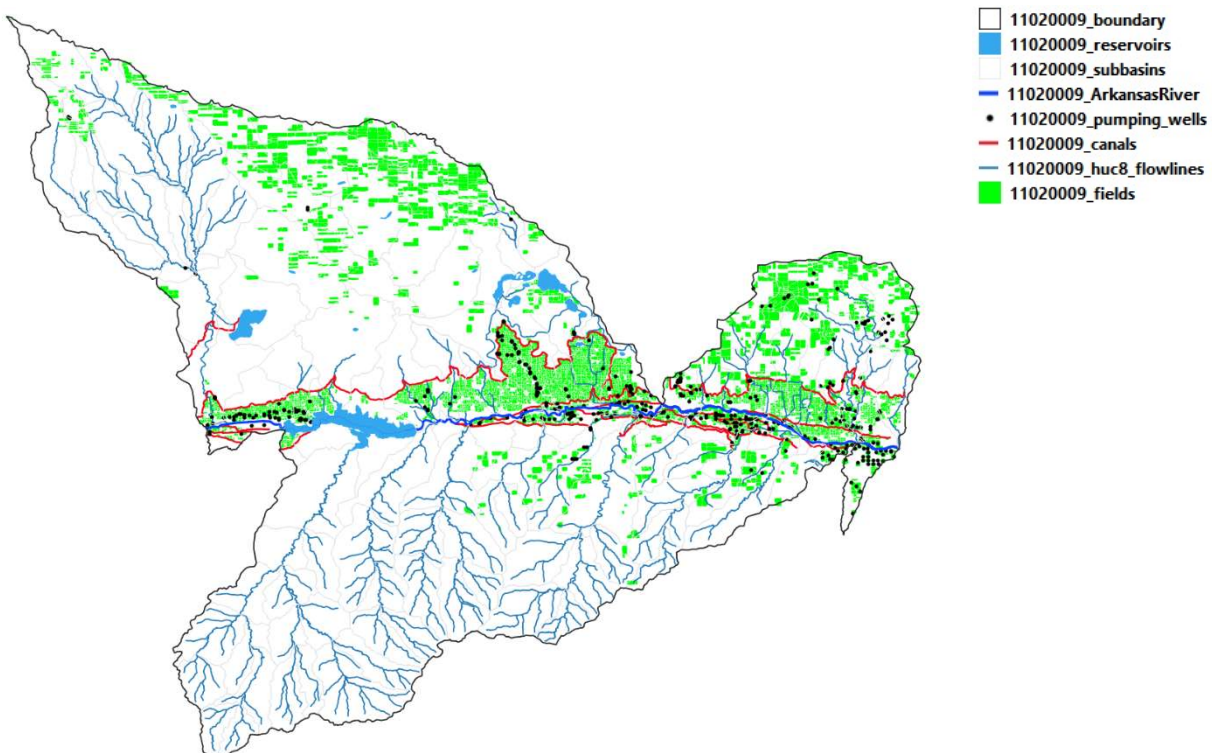

Geographic context for the JMR watershed:

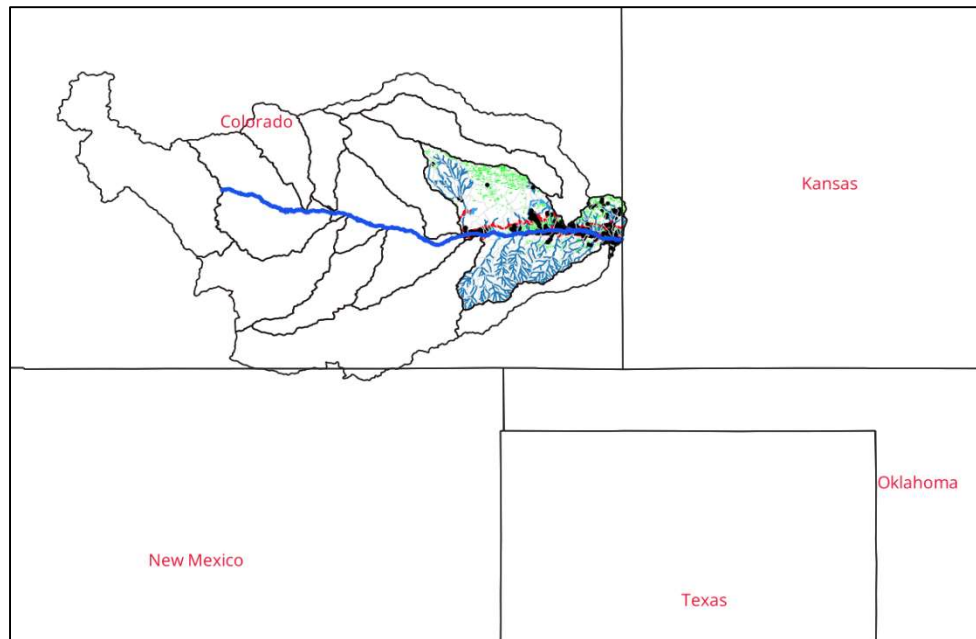

The JMR SWAT+ model has the following features:

- 10,611 HRU objects
- 135 Reservoir objects
- 110 point sources
- 101 routing units and outlets
- 1,324 channels

The JMR MODFLOW model has the following features:

- 500 m grid cells, resulting in 311 rows and 280 columns
- Recharge package (deep percolation from HRUs)
- Evapotranspiration package (ET from shallow groundwater in the plant root zone)
- River package (stream channels and canals)
- Well package (pumping for irrigation)
- Drain package (tile drainage outflow to channels)
- Reservoir package (groundwater-reservoir exchange)

This tutorial will use the following GIS shape files to perform the linkage between SWAT+ and MODFLOW. These are contained in the “gis” folder of the tutorial.

- SWAT+ HRU shape file: [1102009\\_fields.shp](#)
- SWAT+ channel shape file: [11020009\\_huc8\\_flowlines.shp](#)
- SWAT+ boundary: [11020009\\_boundary.shp](#)
- SWAT+ reservoirs: [11020009\\_reservoirs.shp](#)
- MODFLOW grid: [modflow\\_grid.shp](#)

## S1. Overview of SWAT+ MODFLOW

SWAT+MODFLOW is a single Fortran code that integrates MODFLOW-NWT (Niswonger et al., 2011) into the SWAT+ code (version 61.0). There are 13 subroutines written to link SWAT+ objects to MODFLOW grid cells, perform hydrologic flux calculations, and write out results to output files.

The following diagram summarizes the hydrologic fluxes and nutrient loads simulated by SWAT+ (black text) and MODFLOW (blue text).

Within the SWAT+MODFLOW code, the subroutines used to link SWAT+ and MODFLOW are given the prefix “smrt” (**swat-modflow-rt3d**). The linkage input files and the output files specific to MODFLOW are also given the prefix “smrt”. This term is used throughout this manuscript to indicate the new parts of the code. “RT3D” refers to an add-on module for nutrient transport in the aquifer system, and will be included in a second version of this tutorial.

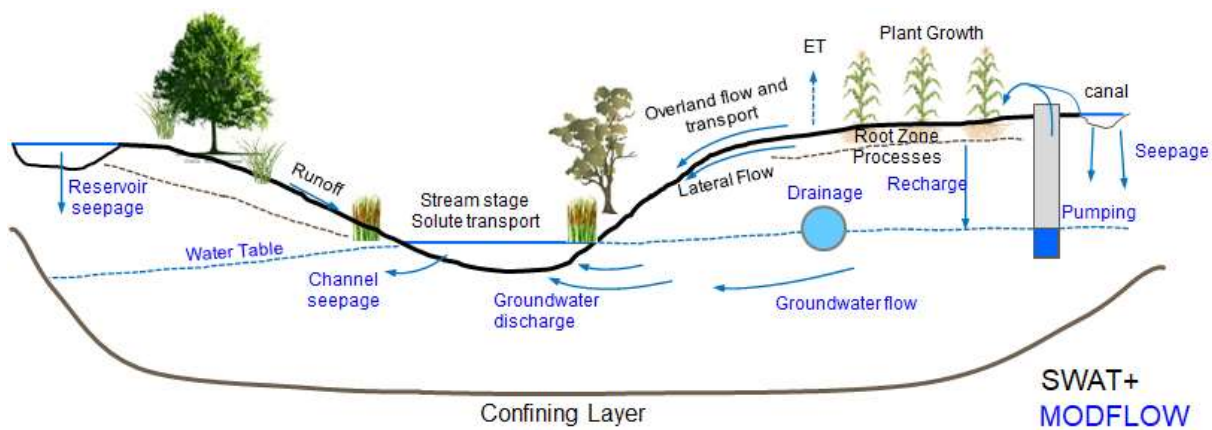

**Figure S1. Cross-section of watershed, showing fluxes simulated by SWAT+ and MODFLOW.**

The groundwater fluxes, the SWAT+ objects to which they are linked, the corresponding MODFLOW package that simulates the flux, the input file that contains the linkage information, and the flux abbreviation used in inputs and outputs, is summarized as follows. More details for each flux are provided in Section S2.

| Groundwater flux          | SWAT+ object | MODFLOW Package | Input file                           | Abbreviation for input/output |
|---------------------------|--------------|-----------------|--------------------------------------|-------------------------------|
| Recharge to water table   | HRUs         | Recharge        | <a href="#">smrt.hrucells</a>        | rech                          |
| GW to soil profile        | HRUs         | Recharge        | <a href="#">smrt.hrucells</a>        | soil                          |
| GW-channel exchange       | Channels     | River           | <a href="#">smrt.chancells</a>       | gws                           |
| GW pumping for irrigation | HRUs         | Well            | <a href="#">water_allocation.wro</a> | pump                          |
| GW-canal exchange         | Channels     | River           | <a href="#">smrt.canalcells</a>      | canl                          |
| GW-drain outflow          | Channels     | Drain           | <a href="#">smrt.drngcells</a>       | drng                          |
| GW-reservoir exchange     | Reservoirs   | Reservoir       | <a href="#">smrt.resvcells</a>       | resv                          |

## S2. Geographic linkage between SWAT+ objects and MODFLOW grid

This section provides details for linking SWAT+ objects to MODFLOW grid cells, to allow for correct simulation of all major hydrologic fluxes in the watershed-aquifer system. All geographic connections are performed using GIS.

### S2.1 Recharge to water table and Groundwater→Soil transfer

#### Overview: Recharge

Recharge to the water table originates from deep percolation that exits the bottom of the soil profile. Deep percolation and recharge are first calculated for each HRU, and then transferred to the MODFLOW grid for the Recharge package.

The following figure (A) shows an example soil profile of an HRU, with 4 layers. Deep percolation water exits the bottom of the soil profile and is routed through the vadose zone to the water table, to simulate recharge to the saturated zone.

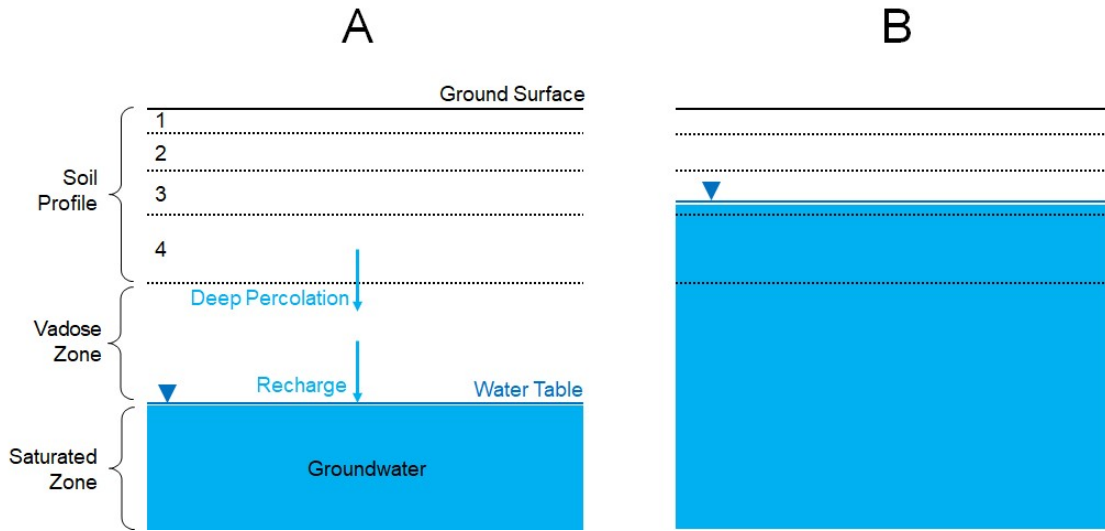

**Figure S2. (A) process of deep percolation and recharge in a coupled soil-aquifer system; (B) condition of water table within the HRU soil layers.**

Routing through the vadose zone is not simulated in a physically based manner, but rather using the following transfer function:

$$R_i = \left[ \left( 1 - e^{-1/\delta} \right) \cdot dp_i \right] + \left[ e^{-1/\delta} R_{i-1} \right]$$

where  $dp_i$  is the depth (mm) of deep percolation for the current day  $i$ ,  $R$  is the recharge from the previous day ( $i-1$ ) and the current day  $i$ , and  $\delta$  is the recharge delay term (days). The term on the left is the recharge from the current day's deep percolation, and the term on the right is the recharge from the previous day's deep percolation. The transfer function spreads out the recharge temporally, so that portions of the deep percolation water reach the water table at different times. The following figure shows two deep percolation events (5 mm, 8 mm), and the resulting recharge to the water table using a delay term of 5 days. The total recharge over the 30-day period is equal to total deep percolation (13 mm) but is spread out temporally.

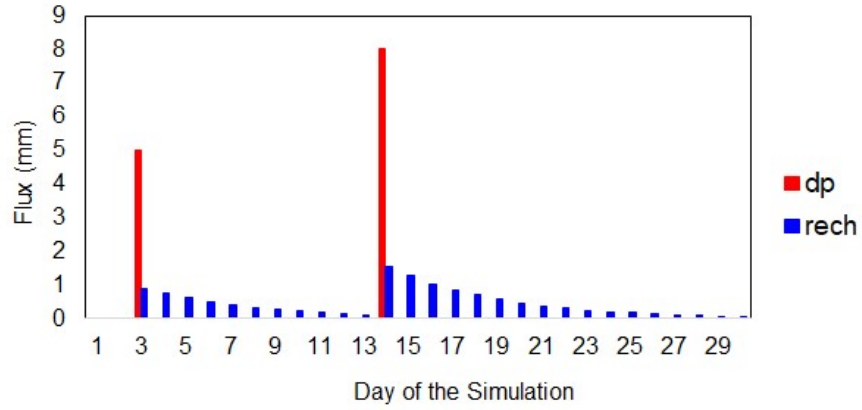

Once daily recharge is calculated for each HRU, the amount of recharge ( $\text{m}^3/\text{day}$ ) to each MODFLOW individual grid cell  $R_{cell}$  is calculated by summing the contribution from all intersecting HRUs:

$$R_{cell} = \sum_{i=1}^n V_{hrui} F_{hrui}$$

where  $V_{hrui}$  is the daily volumetric flow rate of recharge ( $\text{m}^3/\text{day}$ ) for the  $i^{\text{th}}$  HRU connected to the grid cell, and  $F_{hrui}$  is the fraction of the  $i^{\text{th}}$  HRU that is occupied by the cell.

For example, the following figure shows the geographic intersection between cell 49174 and 3 HRUs, highlighted in yellow (6908, 7011, 7012). The area of each HRU is  $412,200 \text{ m}^2$ ,  $85,500 \text{ m}^2$ , and  $234,900 \text{ m}^2$ , respectively. The overlapping area between the cell and each HRU is  $134,080 \text{ m}^2$ ,  $39,275 \text{ m}^2$ , and  $31,211 \text{ m}^2$ , respectively, resulting in HRU fractions of **0.325**, **0.460**, and **0.133**, respectively.

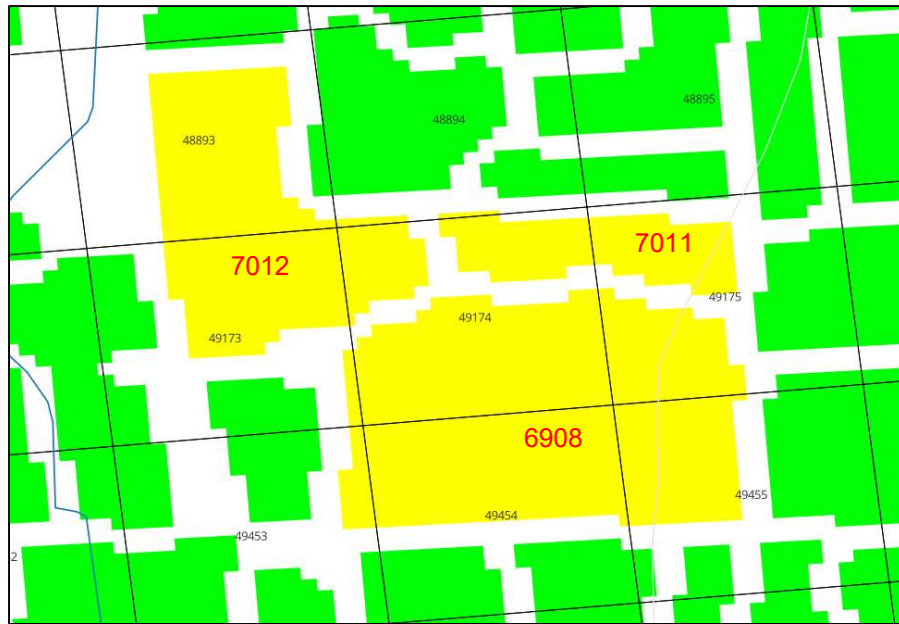

Figure S3. Geographic connection with MODFLOW grid cells and SWAT+ HRUS.

Therefore, if 5 mm of recharge is simulated for each HRU on a given day during the simulation, then the recharge to cell 49174 is calculated as:

$$\text{Recharge volume for HRU 6908} = (5 \text{ mm}/1000) * 412,200 \text{ m}^2 = 2,061 \text{ m}^3$$

$$\text{Recharge volume for HRU 7011} = (5 \text{ mm}/1000) * 85,500 \text{ m}^2 = 428 \text{ m}^3$$

$$\text{Recharge volume for HRU 6908} = (5 \text{ mm}/1000) * 234,900 \text{ m}^2 = 1,175 \text{ m}^3$$

$$R_{cell} = (2,061 \text{ m}^3 * 0.325) + (428 \text{ m}^3 * 0.460) + (1,175 \text{ m}^3 * 0.133) = 1,023 \text{ m}^3$$

Therefore, for this day, the recharge to cell 49174 is 1,023 m<sup>3</sup>. This same process is repeated for each cell of the MODFLOW grid.

#### Overview: Groundwater → Soil Transfer

In some environments and hydrologic conditions, the water table can rise into the soil profile (see Figure S2B). This can occur during high-intensity storm events, or irrigation events in areas with inadequate drainage. Groundwater transfer to the soil profile can lead to increased soil lateral flow, tile drainage, saturation excess flow, and plant ET. The water can also recharge back to the water table. We would like the soil water routing routines of SWAT+ to handle this additional soil water. To do so, the code tracks, for each grid cell, the location of the water table in relation to the soil profile. If the water table is within the soil profile, then the groundwater (and associated nutrient mass) within the soil profile is removed from the grid cell and transferred to the HRU soil profile. The volume of groundwater (m<sup>3</sup>) is added to the soil water within the soil layers below the water table.

If the water table (i.e., groundwater head) is within the HRU soil profile, then the volume of groundwater  $V_{gw}$  to transfer to the soil profile is:

$$V_{gw} = d_{sat} * F_{cell} * S_y$$

where  $d_{sat}$  is the depth of soil profile saturated by the water table (m) (i.e., the vertical distance from the water table to the base of the soil profile),  $F_{cell}$  is the area of the cell the resides spatially in the HRU (m<sup>2</sup>), and  $S_y$  is the aquifer specific yield. This volume is then added to the soil storage array of the soil layers based on the fraction of the layer that is saturated.



### Input file

To simulate the mapping of HRU deep percolation and recharge MODFLOW grid cells and the transfer of groundwater to the HRU soil profile, the geographic intersection information between HRUs and grid cells must be performed in a GIS and then stored in the input file [smrt.hrucells](#). The example file for the JMR model is in the [JMR\\_TxtInOut](#) folder.

The first section of the file is the specification of the groundwater delay term  $\delta$ . The term can be specified for each HRU (as a single-column list), or as a single value that is then applied to each HRU in the model. For the JMR model, a single value (flag = 0) of 5.0 is specified. If the flag = 1, then a list of HRU values is needed.

```
1 smrt.hrucell
2 groundwater delay -----
3 0      flag: 0 = single value; 1 = value for each hru (as a list)
4 5.0    delay term (days)
```

The second section of the file is the specification of groundwater-soil interaction. The user can specify if the groundwater-soil transfer feature is active or inactive, by changing the flag in the second section of the [smrt.hrucells](#) file:

```
smrt.hrucells
groundwater delay -----
0      flag: 0 = single value; 1 = value for each hru (as a list)
5.0    delay term (days)
groundwater --> soil transfer -----
1      flag: 0 = no interaction; 1 = simulate groundwater transfer to soil profile
}HRUs that are connected to cells -----
}
5101
14
15
16
17
```

The third section of the file lists the HRUs that are in connection with MODFLOW grid cells. This is provided, as some HRUs may not be in geographical connection with the grid. For the JMR model, 5,101 of the 10,611 HRUs are in connection with grid cells. Typically, if the grid overlays the entire watershed, each HRU will be in connection with grid cells. The fraction is lower for the JMR model because only cultivated fields are considered as HRUs that are in connection with grid cells.

```
1 HRU-Cell Connection Information
2
3 } HRUs that are connected to cells
4 } 5101
5      14
6      15
7      16
8      17
9      18
10     19
11     20
12     21
13     22
14     23
15     24
16     25
17     26
18     27
19     28
20     29
21     50
22     51
23     52
24     53
```

Number of HRUs  
List of HRU IDs

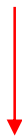

The fourth section of the file lists, for each HRU in connection with grid cells, the connected grid cells and their overlapping area (m<sup>2</sup>). For example, HRU 14 is connected to 6 grid cells (13175, 13176, 13455, 13456, 13457, 13458). The total HRU area is 427,500 m<sup>2</sup>, and the overlapping areas are provided, ranging from 9,480 m<sup>2</sup> to 139,332 m<sup>2</sup>. This information is needed to calculate recharge to the grid cells, as described above.

|      | HRU | area_m2   | cell_ID | poly_area_m2 |
|------|-----|-----------|---------|--------------|
| 5107 | 14  | 427500.00 | 13175   | 9480.05      |
| 5108 | 14  | 427500.00 | 13176   | 6571.63      |
| 5109 | 14  | 427500.00 | 13455   | 44241.01     |
| 5110 | 14  | 427500.00 | 13456   | 131751.73    |
| 5111 | 14  | 427500.00 | 13457   | 139331.77    |
| 5112 | 14  | 427500.00 | 13458   | 96123.77     |
| 5113 | 15  | 256500.00 | 13737   | 107040.47    |
| 5114 | 15  | 256500.00 | 13738   | 60598.50     |
| 5115 | 15  | 256500.00 | 14017   | 47098.56     |
| 5116 | 15  | 256500.00 | 14018   | 41762.48     |
| 5117 | 16  | 186300.00 | 12056   | 129330.24    |
| 5118 | 16  | 186300.00 | 12057   | 35916.27     |
| 5119 | 16  | 186300.00 | 12336   | 14288.42     |
| 5120 | 16  | 186300.00 | 12337   | 6765.07      |
| 5121 | 17  | 324900.00 | 10933   | 60629.98     |
| 5122 | 17  | 324900.00 | 10934   | 24113.65     |
| 5123 | 17  | 324900.00 | 11213   | 169717.23    |
| 5124 | 17  | 324900.00 | 11214   | 21365.92     |
| 5125 | 17  | 324900.00 | 11493   | 49073.21     |
| 5126 | 18  | 297900.00 | 10934   | 34761.30     |
| 5127 | 18  | 297900.00 | 11213   | 5484.28      |

Continues for all 5,101 connected HRUs...

## S2.2 Groundwater ET

ET from the saturated zone is simulated using the EVT package of MODFLOW. Groundwater ET is calculated only if the water table in a grid cell is above a specified elevation  $z_{bot}$  (m), calculated by subtracting a specified ET extinction depth  $EXDP$  (m) (i.e. the depth below which ET cannot occur) from the ground surface  $z_{surf}$  (Figure S4). The maximum depth of ET that can be removed from the saturated zone is equal to the unsatisfied ET  $ET_{remain}$  (mm), set equal to the difference between the potential ET (mm) and the actual ET (mm) simulated for each HRU for the day. The connection between HRUs and grid cells for mapping unsatisfied ET is the same as for mapping soil percolation to grid cell recharge.

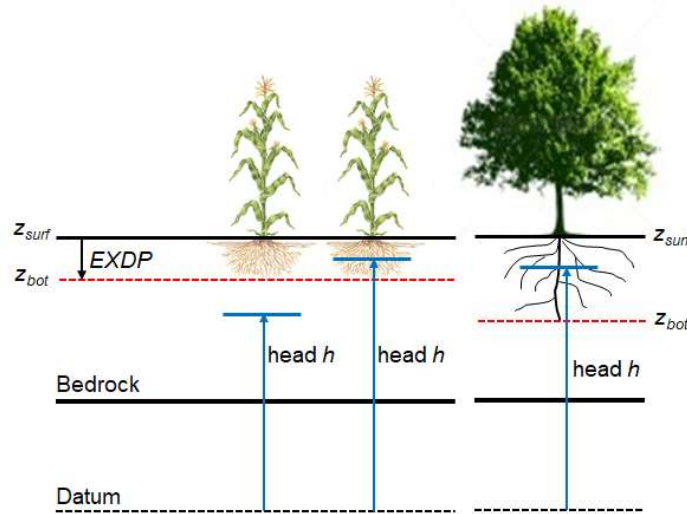

Figure S4. Schematic showing calculation of groundwater ET within the extinction depth  $EXDP$ .

The depth of groundwater  $ET$  (mm) removed from the cell is calculated using the following linear relationship:

$$h_{i,j} < z_{bot} \rightarrow ET_{GW} = 0$$

$$h_{i,j} > z_{bot} \rightarrow ET_{GW} = ET_{remain} \cdot \left( \frac{h_{i,j} - z_{bot}}{z_{surf} - z_{bot}} \right)$$

The depth of groundwater  $ET$  is multiplied by the horizontal spatial area of the HRU to provide a volumetric flow rate in  $m^3/day$ , and then divided amongst the cells connected to the HRU. This groundwater volume is removed from the grid cell. Figure S4 shows the scenario of the  $ET$  equations within the context of the variables. For the row crop (corn as an example), the condition on the left results in no groundwater  $ET$ , whereas the condition on the right would result in groundwater  $ET$  equal to approximately half of  $ET_{remain}$ . For the tree, the condition would result in groundwater  $ET$  equal to more than half of  $ET_{remain}$ . Groundwater  $ET$  can be significant for areas with high water tables and deep-reaching vegetation roots, such as in riparian areas of streams.

Simulating groundwater  $ET$  occurs if the EVT package of MODFLOW is activated. This is described in Section 3.2.

### S2.3 Groundwater-channel exchange

Exchange of water between the aquifer and stream channels is simulated using the River package of MODFLOW. Within the River package, Darcy's Law is used to calculate the daily volumetric flow rate  $Q$  ( $\text{m}^3/\text{day}$ ) of exchange by comparing the groundwater head ( $h_{gw}$ ) in the grid cell to the stream stage ( $h_{stream}$ ) in the channel. If the groundwater head is higher than the stream stage, then groundwater discharges through the channel bed into the channel. If, however, the groundwater head is lower than the stream stage, then stream water seeps through the channel bed into the aquifer. There are three conditions that might occur:

$$h_{gw} > h_{stream}: \quad Q_{gw \rightarrow stream} = (L \cdot W) K_{bed} \left( \frac{h_{gw} - h_{stream}}{d_{bed}} \right)$$

$$h_{stream} > h_{gw} \text{ (} h_{gw} \text{ above channel bottom)} \quad Q_{stream \rightarrow gw} = (L \cdot W) K_{bed} \left( \frac{h_{stream} - h_{gw}}{d_{bed}} \right)$$

$$h_{stream} > h_{gw} \text{ (} h_{gw} \text{ below channel bottom } bot_{bed}) \quad Q_{stream \rightarrow gw} = (L \cdot W) K_{bed} \left( \frac{h_{stream} - bot_{bed}}{d_{bed}} \right)$$

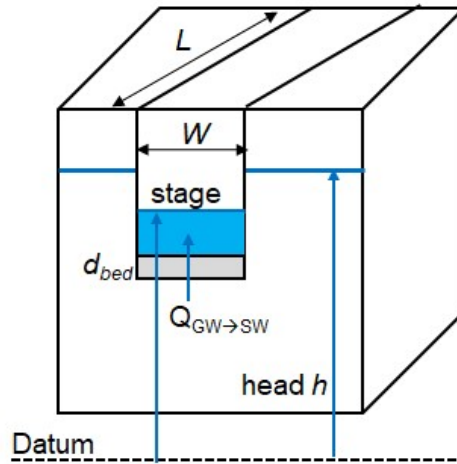

Figure S5. Schematic showing relation between channel water and groundwater within a MODFLOW grid cell.  $W$  = channel width;  $L$  = length of channel within the MODFLOW grid cell;  $d_{bed}$  = channel bed thickness.

For these calculations:

- $W$  is provided by daily simulated width of the corresponding SWAT+ channel
- $h_{stream}$  is provided by daily simulated depth of the corresponding SWAT+ channel
- $h_{gw}$  is provided by daily simulated groundwater head of the corresponding MODFLOW grid cell
- $K_{bed}$  is provided by MODFLOW inputs
- $d_{bed}$  is provided by MODFLOW inputs
- $bot_{bed}$  is provided by MODFLOW inputs
- $L$  is provided by a geographic intersection between SWAT+ channels and MODFLOW grid cells

The geographic intersection between SWAT+ channels and MODFLOW grid cells is shown by the following figure, where yellow cells are those in connection with SWAT+ channels.

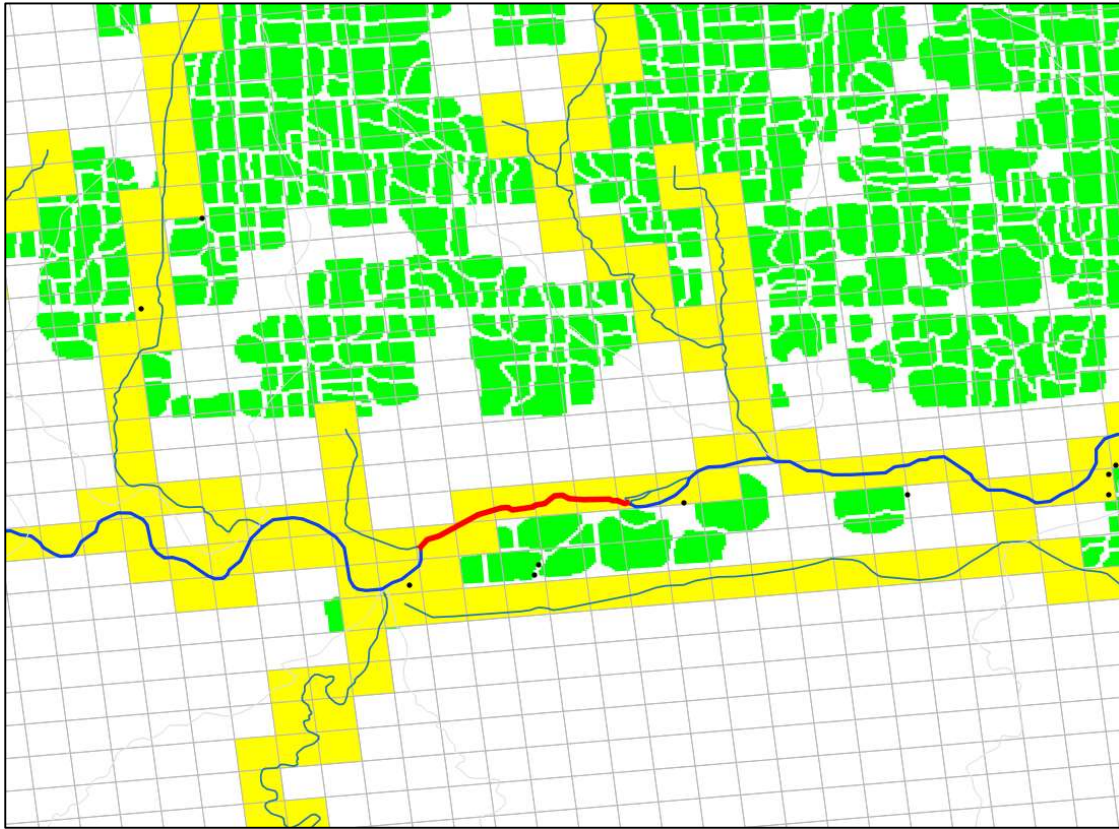

**Figure S6. MODFLOW grid cells (yellow) in connection with SWAT+ channels.**

The channel highlighted in red (channel #497) is along the Arkansas River and is in connection with 7 grid cells. Through an intersection routine within GIS, the length  $L$  of the channel within each of the grid cells is 428 m, 532 m, 562 m, 513 m, 131 m, 525 m, and 119 m. The length of the channel within the grid cell is directly proportional to the area of channel bed in connection with the aquifer, and therefore is a strong control on the amount of water that can be transferred between the aquifer and the channel (see Darcy's Law equations on previous page). The same intersection must be performed for all channels within the SWAT+ model. This can be performed by intersecting the SWAT+ channel shape file with the MODFLOW grid shape file. Then, the length of each channel segment must be calculated within GIS.

Note: if SWAT+ is linked with MODFLOW, then the regular channel seepage calculation with the channel control subroutine is not used. Therefore, the hydraulic conductivity of channel bed sediments as listed in the SWAT+ input files is not used.



The geographic connections between SWAT+ channels and MODFLOW grid cells are listed in the file [smrt.chancells](#). Channel bed properties for Darcy's Law are also listed in this file.

For the JMR model, the beginning of the file is shown below. For each MODFLOW grid cell in connection with a SWAT+ channel, the cell layer is specified, followed by channel bed elevation (m), the connected SWAT+ channel, the length of the channel within the cell, and the channel bed zone. The list of zones is shown at the beginning of the file, with the estimated channel bed hydraulic conductivity (m/day) and thickness (m) for each zone. When the model simulation begins, these parameter values are assigned to grid cells based on the zone specified for each cell. Channel bed zones are used to reduce the number of channel bed parameters included in model calibration. Rather than using one parameter value for each grid cell, values are specified only for zones.

```

1 smrt.chancells
2 Channel bed properties -----
3 5      number of channel bed zones
4 Zone   Channel bed K (m/day)   Channel bed thickness (m)
5 1      0.005                   0.50
6 2      0.050                   0.50
7 3      0.020                   0.50
8 4      0.002                   0.75
9 5      0.010                   0.25
10 Cell-Channel Connection Information -----
11 cell = modflow cell ID
12 layer = layer of modflow cell
13 elev = channel bed elevation (m)
14 chan = SWAT+ channel to which the cell is connected
15 length = length of channel (m) within the cell
16 zone = channel bed property zone
17 cell   layer   elev   chan   length   zone
18 7585    1     1553    35     510.16   1
19 7865    1     1550    35     507.06   1
20 8145    1     1534    35     530.05   1
21 8419    1     1565    37     252.54   1
22 8425    1     1534    34     100.06   1
23 8425    1     1534    35     490.59   1
24 8433    1     1535    41     215.67   1
25 8699    1     1564    37     92.53    1
26 8700    1     1567    37     448.51   1
27 8705    1     1527    34     10.15    1
28 8706    1     1506    36     518.39   1
29 8706    1     1506    34     72.76    1
30 8713    1     1532    41     522.81   1
31 8980    1     1555    37     383.76   1
32 8981    1     1555    37     586.43   1
33 8986    1     1491    36     561.46   1
34 8993    1     1507    41     519.29   1
35 9261    1     1561    37     111.85   1
36 9262    1     1523    37     690.83   1
37 9263    1     1509    37     137.57   1
38 9266    1     1489    36     535.4    1
39 9273    1     1493    41     518.52   1
40 9543    1     1508    37     450.82   1
41 9544    1     1492    37     679.54   1
42 9545    1     1496    37     106.23   1
43 9546    1     1489    36     518.78   1
44 9547    1     1478    36     90.32    1
45 9552    1     1482    41     268.5    1
46 9553    1     1481    41     268.87   1
47 9825    1     1481    37     703.13   1
48 9826    1     1482    37     60.3     1
49 9827    1     1470    36     524.83   1
50 9828    1     1471    36     320.04   1

```

The number of grid cells listed in this file (7,934 for the JMR model) is specified in the [object.cnt](#) input file, as the number of MODFLOW objects. This is described further in Section 3.1.

## S2.4 Groundwater pumping for irrigation and municipal demand

For a standard SWAT+ model, the water allocation module can be used to control water transfer between SWAT+ objects for water demand conditions. Water demand can include irrigation for HRUs or municipal demand. Sources of water for these demands can include channels, reservoirs, aquifers, or unlimited. For the JMR model, HRUs receive irrigation water from channels (via canal diversions), groundwater, and unlimited (canals that divert water upstream of the watershed boundary).

### Irrigation Demand

If SWAT+MODFLOW is being used, and the irrigation source is specified to be “aquifer”, then MODFLOW will simulate groundwater pumping to satisfy the irrigation demand. Irrigation will only occur if sufficient groundwater is available in the grid cell. If the irrigation demand is greater than the available groundwater in the cell, then all groundwater is removed to satisfy a portion of the demand.

There are two options for specifying the grid cells that provide the pumped irrigation water: 1) a single cell is specified; 2) all grid cells connected to the demand HRU (using connections in [smrt.hrucells](#)) are used to satisfy the demand.

There are three files that are used to simulate irrigation: [water\\_allocation.wro](#), [lum.dtl](#), and [irr.ops](#). These are provided in the JMR model folder, and the following shows examples from this model.

Within the [water\\_allocation.wro](#) file, there are 6 source objects (unlimited, aquifer, canal diversions) and 3,920 demand objects (HRUs for irrigation). Each demand object has 1 source object (SRC). For HRU 16, the source object (SRC1) is listed as “2”, which corresponds to the 2<sup>nd</sup> source object, which is “aqu”. If MODFLOW is active, then “aqu” indicates a groundwater source, and pumping will occur from MODFLOW grid cells. If the OB\_NUM value for “aqu” is equal to 0 (as in this case), then all grid cells connected to HRU 16 will undergo pumping, with the HRU irrigation demand volume divided equally among the grid cells. If, however, the OB\_NUM value was given a value > 0, then this value is the ID of the grid cell from which pumping should occur. In this second case, pumping will occur only from a single cell, and the cell-HRU connections in [smrt.hrucells](#) are not used.

```
1 wallo_dat (modified for Arkansas River Basin)
2 1
3 NAME RULE_TYP SRC_OBS DMD_OBS CHA_DB
4 11020009 high_right_first_serve 6 3920 n
5 SRC_NUM OB_TYP OB_NUM JAN_MIN FEB_MIN MAR_MIN APR_MIN MAY_MIN JUN_MIN JUL_MIN AUG_MIN SEP_MIN OCT_MIN NOV_MIN DEC_MIN DESCRIPTION
6 1 unl 0 0 0 0 0 0 0 0 0 0 0 0 0 unlimited source
7 2 aqu 0 0 0 0 0 0 0 0 0 0 0 0 0 modflow source
8 68 div 107 1 1 1 1 1 1 1 1 1 1 1 1 canal_diversion
9 69 div 108 1 1 1 1 1 1 1 1 1 1 1 1 canal_diversion
10 70 div 109 1 1 1 1 1 1 1 1 1 1 1 1 canal_diversion
11 71 div 110 1 1 1 1 1 1 1 1 1 1 1 1 canal_diversion
12 NUMB OB_TYP OB_NUM WITHDR AMOUNT W_RT TR_TYP TREAT RCV_OB RCV_NUM RCV_DTD SRC1 SRC2 FRAC1 COMP1 SCRC2 FRAC2 COMP2
13 1 hru 16 irr_strs8_fld 25.4 jr null null null 0 null 1 2 1 n
14 2 hru 1183 irr_strs8_fld 25.4 jr null null null 0 null 1 1 1 n
15 3 hru 1184 irr_strs8_fld 25.4 jr null null null 0 null 1 1 1 n
16 4 hru 1185 irr_strs8_fld 25.4 jr null null null 0 null 1 1 1 n
17 5 hru 1186 irr_strs8_fld 25.4 jr null null null 0 null 1 1 1 n
18 6 hru 1187 irr_strs8_fld 25.4 jr null null null 0 null 1 1 1 n
19 7 hru 1188 irr_strs8_fld 25.4 jr null null null 0 null 1 1 1 n
20 8 hru 1189 irr_strs8_fld 25.4 jr null null null 0 null 1 1 1 n
21 9 hru 1190 irr_strs8_fld 25.4 jr null null null 0 null 1 1 1 n
22 10 hru 1191 irr_strs8_fld 25.4 jr null null null 0 null 1 1 1 n
23 11 hru 1192 irr_strs8_fld 25.4 jr null null null 0 null 1 1 1 n
24 12 hru 1193 irr_strs8_fld 25.4 jr null null null 0 null 1 1 1 n
25 13 hru 1194 irr_strs8_fld 25.4 jr null null null 0 null 1 1 1 n
26 14 hru 1195 irr_strs8_fld 25.4 jr null null null 0 null 1 1 1 n
27 15 hru 1196 irr_strs8_fld 25.4 jr null null null 0 null 1 1 1 n
28 16 hru 1197 irr_strs8_fld 25.4 jr null null null 0 null 1 1 1 n
29 17 hru 1198 irr_strs8_fld 25.4 jr null null null 0 null 1 1 1 n
30 18 hru 1199 irr_strs8_fld 25.4 jr null null null 0 null 1 1 1 n
31 19 hru 1200 irr_strs8_fld 25.4 jr null null null 0 null 1 1 1 n
32 20 hru 1201 irr_strs8_fld 25.4 jr null null null 0 null 1 1 1 n
33 21 hru 1202 irr_strs8_fld 25.4 jr null null null 0 null 1 1 1 n
34 22 hru 1203 irr_strs8_fld 25.4 jr null null null 0 null 1 1 1 n
```

Irrigation demand (depth = AMOUNT = 25.4 mm for this model) occurs based on the decision table(s) listed under the “WITHDR” column. In this model, the decision tables are **irr\_strs8\_fld** (flood irrigation) and **irr\_strs8\_spk** (sprinkler irrigation), depending on the HRU. These decision tables are listed in the file **lum.dtl**, which contains all land use decision tables. The decision tables **irr\_strs8\_fld** and **irr\_strs8\_spk** have the following form:

```

144      DTBL_NAME      CONDS      ALTS      ACTS
145      irr_str8_cha      1      1      2
146  COND_VAR      OBJ      OBJ_NUMB      LIM_VAR      LIM_OP      LIM_CONST      ALT1
147  w_stress      hru      0      null      -      0.8      <
148  ACT_TYP      OBJ      OBJ_NUM      ACT_NAME      ACT_OPTION      CONST      CONST2      FILE_POINTER      OUT1
149  irr_demand      hru      0      sprinkler      sprinkler      25      20      unlim      y
150  irrigate      cha      1      sprinkler      sprinkler      25      20      null      y
151
152      DTBL_NAME      CONDS      ALTS      ACTS
153      irr_strs8_dmd      1      1      1
154  COND_VAR      OBJ      OBJ_NUMB      LIM_VAR      LIM_OP      LIM_CONST      ALT1
155  w_stress      hru      0      null      -      0.8      <
156  ACT_TYP      OBJ      OBJ_NUM      ACT_NAME      ACT_OPTION      CONST      CONST2      FILE_POINTER      OUT1
157  irr_demand      hru      0      sprinkler      sprinkler      40      20      null      y
158
159      DTBL_NAME      CONDS      ALTS      ACTS
160  irr_strs8_fld      1      1      1
161  COND_VAR      OBJ      OBJ_NUMB      LIM_VAR      LIM_OP      LIM_CONST      ALT1
162  w_stress      hru      0      null      -      0.8      <
163  ACT_TYP      OBJ      OBJ_NUM      ACT_NAME      ACT_OPTION      CONST      CONST2      FILE_POINTER      OUT1
164  irr_demand      hru      0      surface      surface      25.4      20      null      y
165
166      DTBL_NAME      CONDS      ALTS      ACTS
167  irr_strs8_spk      1      1      1
168  COND_VAR      OBJ      OBJ_NUMB      LIM_VAR      LIM_OP      LIM_CONST      ALT1
169  w_stress      hru      0      null      -      0.8      <
170  ACT_TYP      OBJ      OBJ_NUM      ACT_NAME      ACT_OPTION      CONST      CONST2      FILE_POINTER      OUT1
171  irr_demand      hru      0      sprinkler      sprinkler      25.4      20      null      y
172

```

For both decision tables, the conditional variables (COND\_VAR) is “**w\_stress**”, which represents soil water stress. The test condition (LIM\_CONST) is **0.8**, indicating that irrigation will occur if water stress is less than 0.8. If irrigation is triggered, then the irrigation runoff ratios from the file **irr.ops** are used:

```

1  irr_ops Generated from M:\Constructor\HUC8_models\models\11020009.acddb Time: 12/27
2      NAME      IRR_AMT      IRR_EFF      SURQ_RTO      IRR_DEP      IRR_SALT      IRR_NO3N      IRR_PO4
3      drip      50      1.00      0.01      0      0      0      0
4      sprinkler      25.4      1.00      0.05      0      0      0      0
5  subsurface      50      1.00      0.05      150      0      0      0
6      surface      25.4      1.00      0.35      0      0      0      0
7
8

```

Because the **irr\_strs8\_fld** table has the ACT\_OPTION = “surface”, then the runoff ratio SURQ\_RTO applied to each irrigation event is 0.35, typical of flood irrigation. Because the **irr\_strs8\_spk** table has the ACT\_OPTION = “sprinkler”, the runoff ratio is 0.05, typical of sprinkler irrigation.

### Municipal Demand

For municipal demand (OB\_TYP = “muni”), the same two options are available

- 1) *Pumping from single cell*: if the “aqu” source is used, then groundwater pumping will occur from a single cell if the OB\_NUM value for “aqu” is provided with the MODFLOW cell ID.
- 2) *Pumping from multiple cells*: this will occur if “aqu” source is used, OB\_NUM for “aqu” is set to 0, and the OB\_NUM for “muni” is set to an HRU number. In this case, groundwater pumping to satisfy the municipal demand will occur in all cells connected to the specified HRU.



## S2.5 Groundwater-canal exchange

Earthen irrigation canals often seep water to the underlying unconfined aquifer. They can also receive groundwater if the water table is higher than the canal stage. In SWAT+MODFLOW, this exchange is simulated using MODFLOW's River package. The exchange rate ( $\text{m}^3/\text{day}$ ) is calculated using Darcy's Law, for each MODFLOW grid cell in geographic connection with an irrigation canal:

$$Q_{canl} = A_{bed} K_{bed} \left( \frac{h_{canl} - h_{gw}}{d_{bed}} \right)$$

where:

- $A_{bed}$  = the area of the canal bed in contact with the aquifer, within the grid cell ( $\text{m}^2$ ) = the width of the canal (m) \* the length of the canal in the grid cell (m)
- $K_{bed}$  = the hydraulic conductivity of the canal bed material (m/day)
- $h_{canl}$  = the head (stage) of the canal water (m)
- $h_{gw}$  = the head of groundwater in the grid cell (m)
- $d_{bed}$  = the thickness of the canal bed material (m)

These values must be determined for each grid cell in connection with an irrigation canal. For the JMR model, there are 17 canals (red lines in map below). When intersected with the MODFLOW grid, there are **1,277 grid cells** that are designated as "canal cells" (green cells in map), and for which the exchange rate is calculated. The length of the canal in the grid cell can be found from the intersection results. The exchange rate should be calculated only when there is water in the irrigation canal. For the JMR model, this is between April 1 and October 15 of each year.

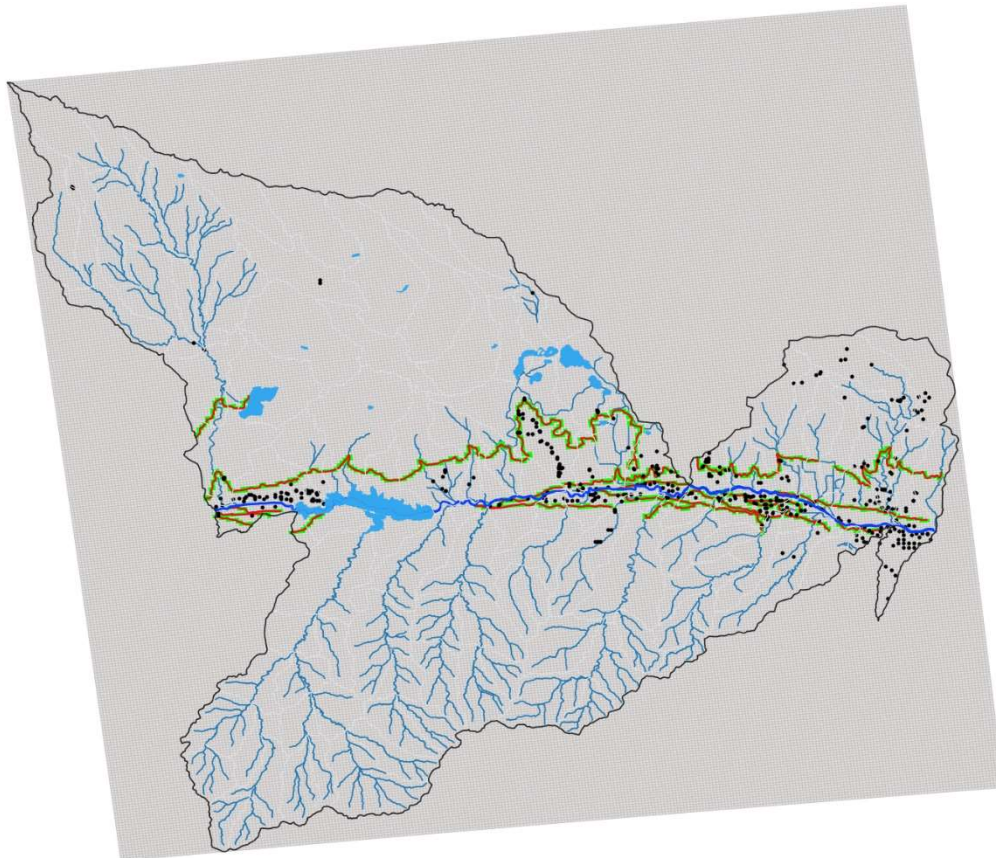

This map shows a close-up of several of the irrigation canals (red lines), intersected with the MODFLOW grid. The “canal cells” are highlighted in green.

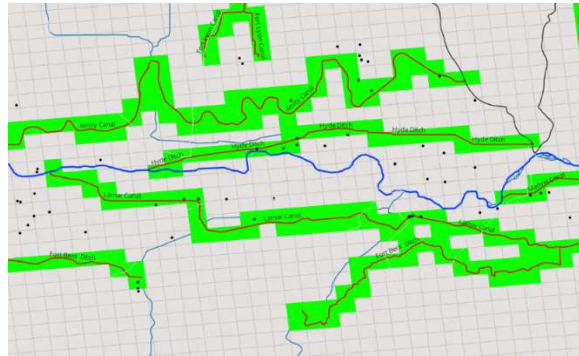

To simulate canal-groundwater exchange in SWAT+MODFLOW, the River package must be active. The specified maximum number of River Cells in the [modflow.riv](#) file must be equal to the River Cells from the channel intersection + River Cells from the canal intersection. For the JMR model, this is **7,934 + 1,277 = 9,211**.

The [smrt.canalcells](#) input file contains information for canals and the geographic connection between canals and grid cells. The information for each canal is listed first, followed by the canal-cell connections. The parameters canal information table (width, depth, thickness, bed\_K) can be used as calibration parameters.

```

1 smrt.canalcells
2 canal information -----
3 channel          SWAT+ channel from which canal is diverted (0 = diversion occurs outside of model boundary)
4 rec_div          canal diversion point source (from recall.con); diversion water that provides canal seepage water
5 width           width of canal (m)
6 depth           depth of canal water (m)
7 thick           thickness of canal bed (m)
8 bed_K           hydraulic conductivity of canal bed (m/day)
9 day_beg         first day of year that canal has water
10 day_end        last day of year that canal has water
11 details        any information user wishes to provide (not used in the code)
12 17
13 canal  channel  rec_div  width  depth  thick  bed_K  day_beg  day_end  details
14 1      0        0        5.00  1.00  0.25  0.005  92      289      Fort Lyon Storage Canal
15 2      0        0        5.00  1.00  0.25  0.005  92      289      Fort Lyon Canal
16 3      508      108      5.00  1.00  0.25  0.005  92      289      Amity Canal
17 4      0        0        5.00  1.00  0.25  0.005  92      289      Animas Town Ditch
18 5      0        0        5.00  1.00  0.25  0.005  92      289      Las Animas Consolidated
19 6      0        0        5.00  1.00  0.25  0.005  92      289      Jones Ditch
20 7      675      109      5.00  1.00  0.25  0.005  92      289      Hyde Ditch
21 8      0        0        5.00  1.00  0.25  0.005  92      289      Consolidated Extension
22 9      675      109      5.00  1.00  0.25  0.005  92      289      Lamar Canal
23 10     500      107      5.00  1.00  0.25  0.005  92      289      Keesee Ditch
24 11     0        0        5.00  1.00  0.25  0.005  92      289      Fort Bent & Keesee Canal
25 12     500      107      5.00  1.00  0.25  0.005  92      289      Fort Bent Ditch
26 13     654      0        5.00  1.00  0.25  0.005  92      289      Manuel Canal
27 14     828      0        5.00  1.00  0.25  0.005  92      289      X-Y Canal
28 15     962      110     5.00  1.00  0.25  0.005  92      289      Buffalo Canal
29 16     0        0        5.00  1.00  0.25  0.005  92      289      Graham Ditch
30 17    1169      0        5.00  1.00  0.25  0.005  92      289      Sisson canal
31 cells in connection with canal -----
32 1277
33 cell           modflow cell ID
34 layer          modflow layer
35 canal          canal ID (from above table)
36 length         length of canal in the grid cell (m)
37 stage          stage of canal water above datum (m)
38 details        any information user wishes to provide (not used in the code)
39 cell  layer    canal  length  stage  details
40 37011  1        1      174.31  1262  Fort Lyon Storage Canal
41 37012  1        1      100.41  1262  Fort Lyon Storage Canal
42 37012  1        1      424.91  1262  Fort Lyon Storage Canal
43 37013  1        1      402.76  1262  Fort Lyon Storage Canal
44 37021  1        1      472.42  1263  Fort Lyon Storage Canal
45 37290  1        1      279.92  1265  Fort Lyon Storage Canal
46 37291  1        1      433.59  1261  Fort Lyon Storage Canal
47 37293  1        1      533.61  1259  Fort Lyon Storage Canal
48 37300  1        1      303.11  1261  Fort Lyon Storage Canal
49 37301  1        1      397.82  1259  Fort Lyon Storage Canal
50 37570  1        1      518.47  1264  Fort Lyon Storage Canal
51 37573  1        1      522.62  1260  Fort Lyon Storage Canal
52 37579  1        1      259.44  1262  Fort Lyon Storage Canal
53 37579  1        1      29.48   1262  Fort Lyon Storage Canal
54 37579  1        1      235.00  1260  Fort Lyon Storage Canal

```

The **rec\_div** column in the first table indicates the point source (if any) of the canal diversion. If there is a point source (negative, for flow out of the channel) in the model associated with this canal diversion, then the “**rec\_div**” number is the point source ID listed in the [recall.con](#) file. When canal seepage is simulated, then this seepage

volume will be provided by the water already diverted to the canal from the channel source. For example, canal 3 (Amity Canal) has “**rec\_div**” = 108. This corresponds to the point source ID 108, listed in [recall.con](#), as see in the following image of the bottom of the [recall.con](#) file:

```

---
104 102 ps_110200091802 1 0 38.33798 -102.1933 1219 102 110200091802 0 0 0 1 out 97 tot 1
105 103 ps_110200091803 1 0 38.16509 -102.0937 1096 103 110200091803 0 0 0 1 out 98 tot 1
106 104 ps_110200091804 1 0 38.18945 -102.1542 1112 104 110200091804 0 0 0 1 out 99 tot 1
107 105 ps_110200091901 1 0 38.13798 -102.0497 1088 105 110200091901 0 0 0 1 out 100 tot 1
108 106 ps_110200091902 1 0 38.01118 -102.1084 1043 106 110200091902 0 0 0 1 out 101 tot 1
109 107 ps_div500 1 0 0 0 0 0 0 0 0 0 1 sdc 500 tot 1
110 108 ps_div508 1 0 0 0 0 0 0 0 0 0 1 sdc 508 tot 1
111 109 ps_div675 1 0 0 0 0 0 0 0 0 0 1 sdc 675 tot 1
112 110 ps_div962 1 0 0 0 0 0 0 0 0 0 1 sdc 962 tot 1

```

Point source 108 (ps\_div500) diverts water from channel (sdc) 500. In the [recall.rec](#) file, this point source has an associated input file [div\\_500\\_ps.dat](#), which contains the daily diversions (negative values; m<sup>3</sup>) from channel 500. This water is used for irrigation, using the water allocation module. When using the groundwater-canal exchange option, i.e., using the input file [smrt.canalcells](#) as shown in this section, then seepage to the aquifer will be taken from the volume of water diverted into the canal. If groundwater discharges water to the canal, then this volume will be added to the volume of water diverted into the canal, which can then be used for irrigation in downstream areas.

## S2.6 Groundwater-drain outflow

Subsurface drains (“tiles”) are often placed in agricultural landscapes to drain excess soil water and groundwater. SWAT+ has a tile drainage routine. While this routine removes excess soil water, drainage should also occur if groundwater rises to the level of the drains. This can be simulated in SWAT+MODFLOW using MODFLOW’s drain package. Within the package, groundwater head is compared to the drain elevation; if the head is higher than the drain, then groundwater is removed via the drain. With new SWAT+MODFLOW linkage routines, this removed groundwater is transferred to SWAT+ channels for channel routing.

The groundwater-drain feature for SWAT+MODFLOW is activated using the Drain package of MODFLOW. The [modflow.drn](#) file is included, which specifies the number Drain cells. For the JMR model, there are 814 Drain cells. These are shown in the figure below.

```
1 #Drain (DRN) package input file
2 814 0 maximum number of drain cells
3 0 0 number of drain cells besides those connected to SWAT+ channels
4
5
```

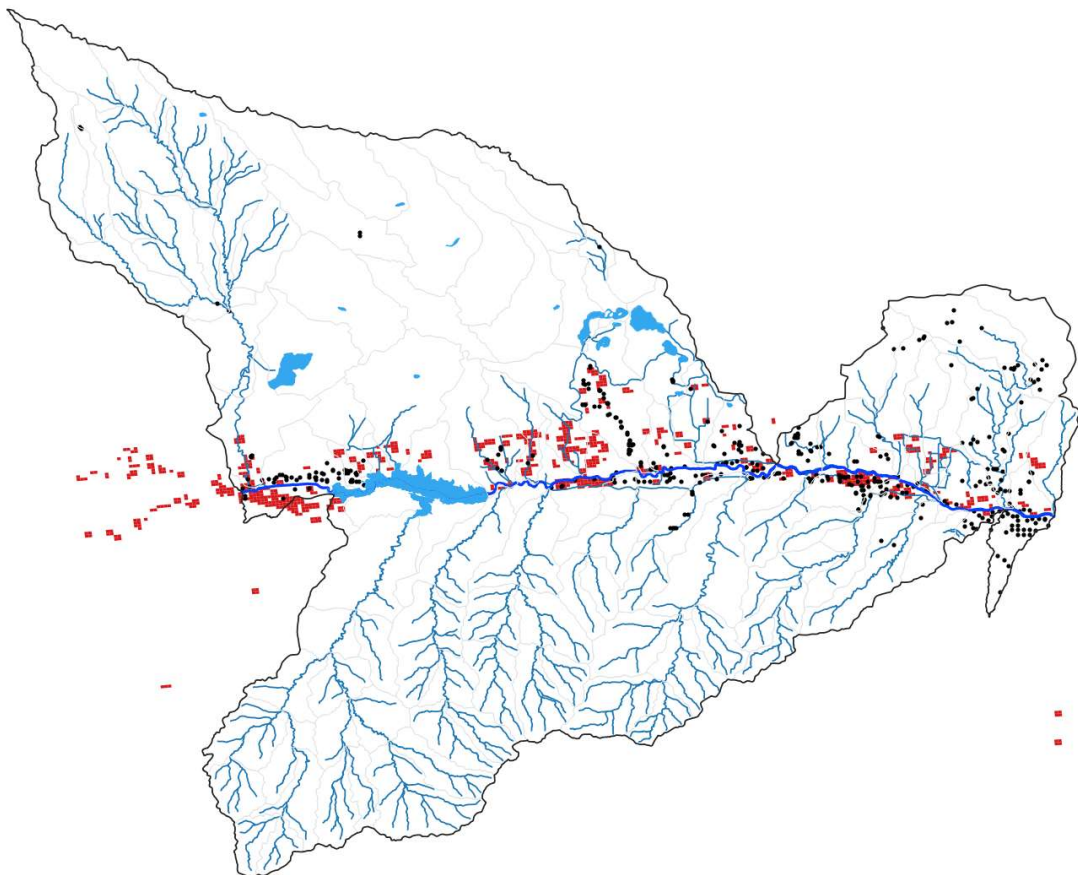



In the normal application of the Drain package for a MODFLOW simulation, the Drain package input file also includes Drain elevation and Drain material conductance for each Drain cell. However, in SWAT+MODFLOW, these inputs are included in the file [smrt.drngcells](#) along with cell-channel connections.

The first section of the file lists the conductance zones. The second section of the file lists the Drain cell, the layer of the cell, the depth (m) of the drain from the ground surface, the SWAT+ channel to which drainage water is transferred, and the conductance zone. For the JMR model, the channel was determined by proximity to the Drain cell.

```

1 smrt.draincells
2 Drainage material properties -----
3 5      number of conductance zones
4 Zone   Conductance (m2/day)
5 1      200.0
6 2      100.0
7 3      250.0
8 4      50.00
9 5      75.00
10 Number of drain cells -----
11 814      number of drain cells
12 Cell-Channel Connection Information -----
13 cell = modflow cell ID
14 layer = layer of modflow cell
15 depth = drain depth below ground surface (m)
16 chan = channel to which drainage water flows
17 zone = conductance zone
18 cell   layer   depth   chan   zone
19 40186   1       1.50    605    1
20 40187   1       1.50    605    1
21 40466   1       1.50    605    1
22 40467   1       1.50    605    1
23 40468   1       1.50    605    1
24 40747   1       1.50    605    1
25 40748   1       1.50    605    1
26 41029   1       1.50    605    1
27 41030   1       1.50    605    1
28 41309   1       1.50    605    1
29 41310   1       1.50    605    1
30 41588   1       1.50    605    1
31 41589   1       1.50    605    1
32 41590   1       1.50    605    1
33 41868   1       1.50    605    1
34 41869   1       1.50    605    1
35 41870   1       1.50    605    1
36 42143   1       1.50    606    1
37 42144   1       1.50    606    1
38 42145   1       1.50    605    1

```

## S2.7 Groundwater-reservoir exchange

Water can be exchanged between reservoirs and an underlying unconfined aquifer. Within SWAT+MODFLOW, this exchange can occur between reservoirs objects and MODFLOW grid cells, using MODFLOW's Reservoir package. The MODFLOW reservoir package input file is not needed. Instead, reservoir information and MODFLOW cell connections are provided in the file [smrt.resvcells](#). The reservoir package uses Darcy's Law to calculate the transfer of water from the aquifer to the reservoir, or from the reservoir to the aquifer, depending on their relative position. For each daily time step of the simulation, the reservoir stage is updated using the simulated reservoir depth of the reservoir object. If MODFLOW is active, then the original seepage calculation in the reservoir control subroutine is not used.

In the JMR model there are 302 MODFLOW grid cells that are connected to reservoir objects. For each cell, the connected reservoir object, stage (m), depth (m), hydraulic conductivity (m/day), and bed thickness (m) are listed.

```
1 smrt.resvcells
2 Number of reservoir cells -----
3 302
4 Cell-Reservoir Connection Information -----
5 cell = modflow cell ID
6 resv = reservoir to which cell is connected
7 stage = elevation of reservoir stage (see reservoir.con)
8 depth = reservoir depth (volume/area; see hydrology.res)
9 hydc = hydraulic conductivity (m/day) of reservoir bottom sediments
10 thick = thickness (m) of reservoir bottom sediments
11 cell resv stage depth hydc thickness
12 8425 8 1577 8.00 0.000005 0.50
13 8426 8 1577 8.00 0.000005 0.50
14 8705 8 1577 8.00 0.000005 0.50
15 8706 8 1577 8.00 0.000005 0.50
16 25261 13 1329 8.00 0.000005 0.50
17 27310 83 1230 1.50 0.000005 0.50
18 27311 83 1230 1.50 0.000005 0.50
19 30954 82 1230 1.50 0.000005 0.50
20 34322 101 1192 1.50 0.000005 0.50
21 34589 87 1218 1.50 0.000005 0.50
22 34590 87 1218 1.50 0.000005 0.50
23 34591 87 1218 1.50 0.000005 0.50
24 34593 84 1230 1.50 0.000005 0.50
25 34594 84 1230 1.50 0.000005 0.50
26 34601 101 1192 1.50 0.000005 0.50
27 34602 101 1192 1.50 0.000005 0.50
28 34603 101 1192 1.50 0.000005 0.50
29 34868 87 1218 1.50 0.000005 0.50
30 34869 87 1218 1.50 0.000005 0.50
31 34870 87 1218 1.50 0.000005 0.50
32 34871 87 1218 1.50 0.000005 0.50
33 34872 84 1230 1.50 0.000005 0.50
34 34872 87 1218 1.50 0.000005 0.50
35 34873 84 1230 1.50 0.000005 0.50
```

## S3. Preparing and modifying SWAT+ and MODFLOW input files

Besides the smrt linkage files described in Section 2, there are several changes that must be made to the original SWAT+ files and MODFLOW files.

### S3.1 Modification to SWAT+ files

Three files need modification when running SWAT+MODFLOW:

**codes.bsn**: this file contains flags to turn on/off certain features in SWAT+. The last column is “modflow”. Set the value to 1 to turn on SWAT+MODFLOW.

**object.cnt**: this file specifies the number of objects for each object type. The “modflow” number should be set to the number of River cells listed in the **smrt.chancells** file. For the JMR model, this is 7,934. Notice that the number of aquifer objects (AQU) is set to 0, since the original aquifer module is not active when MODFLOW is being used.

**file.cio**: this file specifies all files used in the SWAT+ model. For a typical SWAT+ simulation, the aquifer module is active, and therefore the file “aquifer.con” is listed in the 6<sup>th</sup> column of the “CONNECT” line. However, for SWAT+MODFLOW, a new placeholder for the MODFLOW connect file (**modflow.con**) is included on this line. Since the original aquifer module is not active, the name in the 6<sup>th</sup> column is set to “null”, and instead “modflow.con” is written in the 5<sup>th</sup> column. With this set-up, the SWAT+ code knows to look for the **modflow.con**, which is written to file when the **smrt\_chancells** file is read. Therefore, the user does not need to create a **modflow.con** file but can view it in the model folder once the model is running.

```
1 file_cio Generated from M:\Constructor\HUC8_models\models\11020009.acddb Time: 12/27/2022 10:56:59 PM
2 SIMULATION time.sim print.prt object.prt object.cnt constituents.cs
3 BASIN codes.bsn parameters.bsn
4 CLIMATE weather-sta.cli weather-wgn.cli wind-dir.cli pcp.cli tmp.cli slr.cli
5 CONNECT hru.con hru-lte.con rout_unit.con rout_unit.con null null
6 CHANNEL initial.cha channel.cha hydrology.cha sediment.cha nutrients.cha channel-lte.cha
7 RESERVOIR initial.res reservoir.res hydrology.res sediment.res nutrients.res weir.res
8 ROUT_UNIT rout_unit.def rout_unit.ele rout_unit.rtu rout_unit.dr
9 HRII hru-data hru hru-lte hru
```

**Note about rout\_unit.con**: The routing unit connect file contains connection information between routing units and other SWAT+ objects. For a typical SWAT+ model (e.g., created using QSWAT+), aquifer recharge is connected routing units, using “aqu” for the object type and “rhg” for the hydrograph type. For SWAT+MODFLOW, however, the original aquifer module is not used, and this “aqu” connection in **rout\_unit.con** should be removed. However, the SWAT+ code has been modified to eliminate this connection if MODFLOW is active. Therefore, no changes to the **rout\_unit.con** are needed.

### S3.2 Modification to MODFLOW files

MODFLOW uses one input file for each active package: the river package has one input file, the drain package has one input file, and so on. The MODFLOW files are listed in the “name file” called [modflow.nam](#). As such, this functions in the same way as the [file.cio](#) file for SWAT+. You can see this file in the JMR model folder.

Several of the MODFLOW files are used in the same manner as in original MODFLOW simulations. Other files are modified for use in SWAT+MODFLOW. This section provides details for all necessary files.

#### Name file ([modflow.nam](#))

The name file lists all files used in a MODFLOW simulation. For stand-alone MODFLOW simulations, the user can provide any file name for the name file. However, for SWAT+MODFLOW simulations, **the code has been modified so that the file name [modflow.nam](#) must be used**. Below is the [modflow.nam](#) file for the JMR model, with red text provided only as description in the figure and is not in the actual file. The user decides the name for each input file. The boxed files are those required for SWAT+MODFLOW simulations. The output files are:

- [modflow.out](#): main MODFLOW output, containing solver progress and water balance summaries. If the SWAT+MODFLOW simulation stalls or stops, this file should be checked to see if there is a convergence issue with MODFLOW. There will be a message at the bottom of the file stating that convergence is not achieved.
- [modflow.hed](#): simulated groundwater head for each grid cell for time steps specified in the output control \*.oc file.
- [modflow.ccf](#): binary file containing flow rate and head data for each grid cell; typically only used for post-processing MODFLOW software such as *GMS*, *Groundwater Vistas*, or *VisualMODFLOW*.

|    |                            |      |             |
|----|----------------------------|------|-------------|
| 1  | # MODFLOW-NWT name file    |      |             |
| 2  | # Output Files             |      |             |
| 3  | LIST                       | 5001 | modflow.out |
| 4  | DATA                       | 5002 | modflow.hed |
| 5  | DATA(BINARY)               | 5003 | modflow.ccf |
| 6  | # Global Input Files       |      |             |
| 7  | DIS                        | 5010 | modflow.dis |
| 8  | # Flow Process Input Files |      |             |
| 9  | BAS6                       | 5020 | modflow.bas |
| 10 | UPW                        | 5021 | modflow.upw |
| 11 | RCH                        | 5022 | modflow.rch |
| 12 | RIV                        | 5023 | modflow.riv |
| 13 | DRN                        | 5024 | modflow.drn |
| 14 | WEL                        | 5025 | modflow.wel |
| 15 | EVT                        | 5026 | modflow.evt |
| 16 | NWT                        | 5027 | modflow.nwt |
| 17 | OC                         | 5028 | modflow.oc  |

Discretization (grid, timesteps)

Basic package (active cell array; initial head values)

Upstream Weighting package (aquifer properties)

Recharge package

River package

Drain package

Well package (groundwater pumping/injection)

Evapotranspiration package

Newton solver

Output control

The integers next to each package (e.g., 5022 for the Recharge package) are file index identifiers used by the MODFLOW code. These numbers are often below 100 for stand-alone MODFLOW simulations. However, as each input/output file in the SWAT+MODFLOW simulation must have a unique number, the MODFLOW input and output files are given numbers > 5000 so as not to coincide with numbers already provided to the SWAT+ input files. **Therefore: always check the numbers in the [modflow.nam](#) file to make sure they are above 5000.**



### Discretization package

The Discretization file ([modflow.dis](#) for the JMR model) contains all information for spatial (grid cell size and layering) and temporal (time steps, stress periods) discretization. Instructions for preparing the Discretization input file is found at <https://water.usgs.gov/ogw/modflow-nwt/MODFLOW-NWT-Guide/>.

The first section of the file specifies the number of layers, rows, and columns, and the cell size (m).

The second section lists the top elevation (m) (e.g., ground surface elevation) for each grid cell, in 2D array format, followed by the array for the bottom elevation (m) of each grid cell; this is repeated for the number of layers in the MODFLOW grid. The JMR model has a single layer representing the unconfined aquifer. Top elevation for each grid cell was determined in GIS using a digital elevation model, spatial joined to the grid cell shape file. Bottom elevation was determined using an aquifer thickness data (<https://data.isric.org/>; search “Absolute depth to bedrock”).

```
1 1# Discretization (DIS) input file
2      1 311 280 1 4 2 #layers, #rows, #columns, #stress periods, days, meters
3      0
4      CONSTANT 500
5      CONSTANT 500
6      INTERNAL 1.0 (free) -1 # Ground Surface Elevation
7 1633 1629 1629 1619 1619 1619 1613 1611 1609 1607 1606 1593 1593 159
8 1633 1629 1625 1622 1617 1615 1615 1612 1609 1609 1605 1596 1596 159
9 1626 1627 1624 1619 1617 1616 1616 1609 1610 1603 1603 1601 1595 158
10 1625 1625 1623 1619 1617 1617 1615 1610 1609 1608 1607 1595 1595 159
11 1629 1621 1617 1617 1616 1616 1614 1609 1611 1604 1599 1599 1590 159
12 1613 1622 1618 1616 1614 1614 1613 1610 1612 1605 1601 1601 1594 159
13 1587 1599 1607 1615 1612 1612 1610 1609 1607 1607 1603 1597 1597 159
14 1587 1599 1607 1615 1612 1612 1610 1609 1607 1607 1603 1596 1596 159
15 1574 1577 1597 1614 1611 1609 1609 1609 1607 1607 1603 1596 1596 159
16 1567 1574 1614 1614 1611 1611 1608 1606 1606 1606 1601 1597 1597 159
17 1566 1576 1590 1617 1613 1613 1608 1605 1604 1603 1601 1597 1597 159
18 1565 1575 1614 1620 1615 1615 1607 1605 1605 1604 1598 1595 1595 159
19 1570 1570 1604 1624 1618 1618 1611 1606 1604 1598 1598 1596 1591 159
20 1560 1576 1592 1608 1621 1614 1614 1609 1607 1599 1595 1595 1590 159
21 1560 1576 1592 1608 1621 1614 1614 1609 1607 1599 1595 1595 1590 159
22 1570 1575 1584 1591 1621 1621 1617 1613 1605 1598 1597 1589 1589 158
23 1563 1565 1573 1584 1618 1618 1619 1616 1607 1602 1597 1592 1587 158
24 1560 1578 1578 1617 1619 1619 1616 1614 1610 1593 1593 1591 1588 158
25 1551 1577 1577 1612 1615 1615 1615 1613 1611 1604 1594 1588 1588 158
26 1557 1564 1596 1608 1613 1613 1611 1611 1609 1599 1595 1585 1585 158
27 1558 1569 1588 1610 1610 1610 1610 1610 1607 1600 1596 1590 1584 158
28 1552 1568 1576 1595 1609 1609 1608 1608 1604 1598 1598 1587 1584 158
29 1552 1568 1576 1595 1609 1609 1608 1608 1604 1598 1598 1587 1584 158
30 1549 1561 1567 1583 1606 1605 1605 1606 1604 1602 1599 1589 1586 158
31 1545 1552 1561 1594 1606 1606 1603 1602 1602 1601 1595 1590 1583 158
32 1540 1546 1553 1573 1598 1598 1600 1600 1601 1600 1594 1589 1589 158
33 1535 1541 1555 1568 1586 1586 1599 1597 1599 1596 1594 1590 1590 159
34 1531 1538 1567 1577 1590 1590 1597 1596 1594 1595 1594 1591 1587 158
35 1527 1546 1554 1562 1593 1593 1594 1592 1592 1592 1591 1589 1585 158
```

The third section lists time step information. MODFLOW can be run in two settings: “steady-state” (SS) and “transient” (TR) (i.e., unsteady flow). For SWAT+MODFLOW, the “transient” option must be specified. This option is found at the bottom of the file, as shown in the diagram below. For SWAT+MODFLOW simulations, set the length of the stress period to at least the number of days in the SWAT+ simulation. This will result in daily time steps, to match the SWAT+ time step length.

```
626 1519.3 1500.86 1496.24 1506.36 1506.43 1508.03 14
627 1507.82 1523.85 1504.15 1609.04 1549.65 1546.19 15
628 1510.5 1524.79 1505.1 1608.71 1546.73 1552.88 15
629 1557.07 1582.76 1507.85 1565.64 1613.93 1619.27 15
630 7686 7686 1 TR Length (days) of stress period; # of time steps in the stress period.
631
632
```

## Output control

The output control input file ([modflow.oc](#)) contains instructions for MODFLOW to print groundwater head and water balance at specified times of the simulation. The groundwater head is written to the \*.hed file specified in the [modflow.nam](#) file ([modflow.hed](#)) and the water balance data is written to the \*.out file ([modflow.out](#)).

Instructions for preparing the Output Control file is found at <https://water.usgs.gov/ogw/modflow-nwt/MODFLOW-NWT-Guide/>. **Note: monthly and yearly averaged head values are written to other output files as part of the SWAT+MODFLOW code. See Section 6.**

|    |                                   |                                                                                                       |
|----|-----------------------------------|-------------------------------------------------------------------------------------------------------|
| 1  | ⊞# Output Control (OC) input file |                                                                                                       |
| 2  | HEAD SAVE FORMAT (280F10.2) LABEL | Writes head values in a table with 280 columns; 10 spaces, with 2 decimal points                      |
| 3  | HEAD SAVE UNIT 5002               | Integer must match the integer provided to <a href="#">modflow.hed</a> in <a href="#">modflow.nam</a> |
| 4  | COMPACT BUDGET AUX                |                                                                                                       |
| 5  | PERIOD 1 STEP 1                   | Head and water balance written on day 1 of the simulation                                             |
| 6  | Print HEAD                        |                                                                                                       |
| 7  | Print BUDGET                      |                                                                                                       |
| 8  | Save HEAD                         |                                                                                                       |
| 9  | ⊞ Save BUDGET                     |                                                                                                       |
| 10 | PERIOD 1 STEP 31                  | Head and water balance written on day 31 of the simulation                                            |
| 11 | Print HEAD                        |                                                                                                       |
| 12 | Print BUDGET                      |                                                                                                       |
| 13 | Save HEAD                         |                                                                                                       |
| 14 | ⊞ Save BUDGET                     |                                                                                                       |
| 15 | PERIOD 1 STEP 59                  |                                                                                                       |
| 16 | Print HEAD                        |                                                                                                       |
| 17 | Print BUDGET                      |                                                                                                       |
| 18 | Save HEAD                         |                                                                                                       |
| 19 | ⊞ Save BUDGET                     |                                                                                                       |
| 20 | PERIOD 1 STEP 90                  |                                                                                                       |
| 21 | Print HEAD                        |                                                                                                       |
| 22 | Print BUDGET                      |                                                                                                       |
| 23 | Save HEAD                         |                                                                                                       |
| 24 | ⊞ Save BUDGET                     |                                                                                                       |
| 25 | PERIOD 1 STEP 120                 |                                                                                                       |
| 26 | Print HEAD                        |                                                                                                       |
| 27 | Print BUDGET                      |                                                                                                       |
| 28 | Save HEAD                         |                                                                                                       |
| 29 | ⊞ Save BUDGET                     |                                                                                                       |
| 30 | PERIOD 1 STEP 151                 |                                                                                                       |
| 31 | Print HEAD                        |                                                                                                       |
| 32 | Print BUDGET                      |                                                                                                       |
| 33 | Save HEAD                         |                                                                                                       |
| 34 | ⊞ Save BUDGET                     |                                                                                                       |
| 35 | PERIOD 1 STEP 181                 |                                                                                                       |

### River package

For typical MODFLOW simulations, the properties (stage, bed conductance, bed elevation) of each River cell must be written in the river package file ([modflow.riv](#)), for each stress period of the simulation. In SWAT+MODFLOW simulations, however, these properties are specified in [smrt.chancells](#). The only item needed in [modflow.riv](#) is the maximum number of river cells in the simulation, so that river package arrays can be sized properly. The number of river cells is the summation of cells intersected with SWAT+ channels and cells intersected with irrigation canals.

For the JMR model, is  $7,934 + 1,277 = 9,211$ .

The file structure is:

```
1 # River (RIV) package input file
2 9211 0          maximum number of river cells
3 0 0            number of river cells besides those connected to SWAT+ channels
4
5
```

### Recharge package

The Recharge package must be activated to enable recharge from SWAT+ HRUs to be mapped to the MODFLOW grid cells. Instructions for preparing the Recharge package input file is found at

<https://water.usgs.gov/ogw/modflow-nwt/MODFLOW-NWT-Guide/>. In this example, the file is named

[modflow.rch](#). The file structure is:

```
1 # Recharge (RCH) package input file
2 3,40
3 0 0
4 CONSTANT 0.000
5
```

The “CONSTANT” signifies the rate (m/day) applied to each MODFLOW grid cell. **This value is over-written** by HRU recharge for each day of the simulation.

### EVT package

Groundwater ET simulation is described in Section 2.2. The EVT package must be activated to enable ET from shallow groundwater. This ET is in addition to the ET from the soil profile as calculated for SWAT+ HRUs.

Instructions for preparing the EVT package input file is found at <https://water.usgs.gov/ogw/modflow-nwt/MODFLOW-NWT-Guide/>. The file structure is:

```
1 1# EVT: Evapotranspiration package file created on 7/6/2018 by ModelMuse version 3.10.0.0.
2      3      0 # DataSet 2: NEVTOP IEVTCB
3      1      1      1      -1 # Data Set 5: INSURF INEVTR INEXDP INIEVT Stress period 1
4  CONSTANT 0.000          # Data Set 6: SURF
5  CONSTANT 0.000          # Data Set 7: EVTR
6  CONSTANT 2.000          # Data Set 9: EXDP Extinction depth (m); depth below which no ET occurs.
7
8
```

Notice that the SURF and EVTR array values are set to 0.000. Within the SWAT+MODFLOW code, the SURF cell values (ground surface elevation) are given the elevation of the cells in the top layer, and the EVTR values (potential ET) are given the difference between potential ET and actual ET simulated by each SWAT HRU, with the HRU values mapped to the MODFLOW grid cells:

$$EVTR = ET_{potential} - ET_{actual}$$

This residual ET can be removed from the saturated zone of the aquifer if the water table is above the extinction depth EXDP. The user can modify the value for EXDP. For this example, EXDP is set to 2.0 m below the ground surface, i.e., ET from groundwater cannot occur when the water table drops to below 2.0 m from the ground surface. **If ET from shallow groundwater is not desired in the simulation**, then the user should set EXDP to 0.00.

### Well package

Groundwater pumping for irrigation and municipal water supply is described in Section 2.4. To active the option of groundwater pumping, the Well package for MODFLOW must be active, and the maximum number of Well cells (i.e., cells for which groundwater pumping occurs) must be specified in [modflow.wel](#) so that the Well package arrays can be sized properly. The layer from which pumping occurs must also be specified. **Do not include any leading lines that begin with “#”.**

The file structure is:

```
1 1      pumping layer for irrigation (water_allocation.wro)
2 10000 0 AUX IFACE NAME Maximum number of Well cells for any day during the simulation.
3 0 0
4
```

### Drain package

Subsurface drainage from the aquifer to SWAT+ channels is described in Section 2.6. The groundwater-drain feature for SWAT+MODFLOW is activated using the Drain package of MODFLOW. The [modflow.drn](#) file is included, which specifies the number Drain cells. For the JMR model, there are 814 Drain cells. These are shown in the figure below.

```
1 #Drain (DRN) package input file
2 814 0 maximum number of drain cells
3 0 0 number of drain cells besides those connected to SWAT+ channels
4
5
```

### Reservoir package

Reservoir-aquifer exchange is described in Section 2.7 and is simulated using the Reservoir package of MODFLOW. This feature is activated if the [smrt.resvcells](#) file is present, and does not require a companion MODFLOW input file.

### Observation file

Daily groundwater head values can be output for selected MODFLOW grid cells, termed “observation cells”. These values can then be plotted as a groundwater well hydrograph time series and compared to groundwater level data from monitoring wells. The [modflow.obs](#) file lists these cells. For the JMR model, there are 111 observation cells, each corresponding to a monitoring well from the US Geological Survey (USGS). The third column is an identifier for user convenience, but is not read in. For the JMR model, this identifier is the USGS monitoring well ID.

```
1 MODFLOW observation cells
2 111 number of observation cells
3 cell_id layer identifier (not read in)
4 38329 1 382030102115000
5 38633 1 382050102032000
6 41304 1 381444102470900
7 41419 1 381730102082000
8 41670 1 381650102180000
9 42145 1 381348102464900
10 42428 1 381345102453600
11 42805 1 381450102114000
12 42805 1 381610102124000
13 43106 1 381630102053000
14 43269 1 381256102451000
15 43662 1 381600102064000
16 43915 1 381510102162000
17 43918 1 381500102150000
18 44208 1 381520102112000
19 44485 1 381430102125000
20 44511 1 381530102035000
21 45232 1 381112102440801
22 46073 1 381017102432400
23 46165 1 381300102123000
24 46528 1 380645103185400
```

**Note:** this file is not required to run a SWAT+MODFLOW simulation. The code searches for this file to active this option.

## S4. SWAT+MODFLOW code structure

---

Users may wish to make changes to the SWAT+MODFLOW code, or to debug a model to learn about the code or determine why a model simulation crashes. This section shows the main code structure of SWAT+MODFLOW. Subroutines created for SWAT+MODFLOW linkage and running are highlighted in maroon text. The SWAT+MODFLOW source code is available in the folder “SourceCode”.

For each daily time step (within the **time\_control** loop), the subroutine **smrt\_run** is called, which maps SWAT+ information to MODFLOW arrays, calls MODFLOW to solve the groundwater flow equation for each grid cell, and then uses the MODFLOW groundwater head and flow results to populate SWAT+ variables (i.e., update streamflow based on aquifer-channel exchange, aquifer-drain exchange, and aquifer-canal exchange).

### main

```
proc_bsn
    basin_read_cc (read modflow flag in codes.bsn)
    basin_read_objs (read modflow number in object.cnt)
    readcio_read (read modflow.con in file.cio)

hyd_connect
    smrt_initialize
        mf_read (read MODFLOW input files)
        smrt_hrucell (read smrt_hrucells)
        smrt_canl_read (read smrt_canalcells)
        smrt_drng_read (read smrt_drngcells)
        smrt_resv_read (read smrt_resvcells)
        prepare groundwater balance and flux files
        rt_read (read RT3D input files)
        prepare concentration and load files
        smrt_chan_read (read smrt_chancells; write modflow.con)

time_control: day loop
    wallo_control
        wallo_withdraw
            smrt_well (determine pumping rate for each cell; irrigation or municipal)
    command
        smrt_run
            smrt_conversion2mf (map SWAT+ information to MODFLOW: recharge; ET;
                                soil transfer; river stage and bed conductance; canal bed
                                conductance; reservoir stage)
            mf_run (run MODFLOW → run RT3D: smrt_conversion2rt3d; rt_run)
            smrt_conversion2swat (map MODFLOW information to SWAT+: aquifer-
                                channel exchange; aquifer-canal exchange; aquifer-
                                drain exchange; aquifer-reservoir exchange)
        smrt_output (output model-wide groundwater fluxes; output monthly and yearly
                    groundwater head and fluxes for each cell; groundwater concentrations
                    and loads for each cell)
```

## S5. Running a SWAT+ MODFLOW simulation

---

### S5.1 Assemble model input files

The files necessary to run SWAT+MODFLOW are:

#### MODFLOW files

- [modflow.nam](#)
- [modflow.nwt](#)
- [modflow.bas](#)
- [modflow.dis](#)
- [modflow.oc](#)
- [modflow.upw](#)
- [modflow.rch](#)
- [modflow.riv](#)
- [modflow.evt](#)
- [modflow.wel](#) (optional)
- [modflow.drn](#) (optional)

#### Linkage files

- [smrt.hrucells](#)
- [smrt.chancells](#)
- [smrt.canalcells](#) (optional)
- [smrt.drngcells](#) (optional)
- [smrt.resvcells](#) (optional)

#### Modified SWAT+ files

- [codes.bsn](#)
- [object.cnt](#)
- [file.cio](#)

These files are all placed in the SWAT+ model folder that contains all input files. For the JMR model example, all files are in the folder “JMR\_TxtInOut”. You can open up each file inside a text editor (e.g., Notepad++, a free source code editor for use with Microsoft Windows; EditPlus, a text editor for Windows) to view the contents.



## S5.2 Run SWAT+MODFLOW simulation

Once all files are ready, the SWAT+MODFLOW simulation can be run by double-clicking the SWAT+MODFLOW.exe executable, as shown in the following figure that shows a portion of the model folder contents.

| Projects > 5 SWAT+MODFLOW > Tutorial > JMR_TxtInOut |                     |                       |           |  | Search JMR_TxtInOut |
|-----------------------------------------------------|---------------------|-----------------------|-----------|--|---------------------|
| Name                                                | Date modified       | Type                  | Size      |  |                     |
| smrt_out_rt_rech_yr                                 | 9/11/2024 6:11 PM   | File                  | 1 KB      |  |                     |
| smrt_out_rt_resv_mo                                 | 9/11/2024 6:11 PM   | File                  | 1 KB      |  |                     |
| smrt_out_rt_resv_yr                                 | 9/11/2024 6:11 PM   | File                  | 1 KB      |  |                     |
| smrt_out_rt_soil_mo                                 | 9/11/2024 6:11 PM   | File                  | 1 KB      |  |                     |
| smrt_out_rt_soil_yr                                 | 9/11/2024 6:11 PM   | File                  | 1 KB      |  |                     |
| snow.sno                                            | 6/27/2024 9:51 PM   | SNO File              | 1 KB      |  |                     |
| snow.sno.tpl                                        | 11/27/2023 12:51 PM | TPL File              | 1 KB      |  |                     |
| soil_plant.ini                                      | 6/26/2024 8:20 PM   | Configuration sett... | 643 KB    |  |                     |
| soil_plant.ini_cs                                   | 6/26/2024 8:20 PM   | INI_CS File           | 788 KB    |  |                     |
| soils.sol                                           | 6/27/2024 9:51 PM   | SOL File              | 101 KB    |  |                     |
| soils.sol.tpl                                       | 11/27/2023 7:35 PM  | TPL File              | 101 KB    |  |                     |
| success.fin                                         | 9/11/2024 11:06 AM  | FIN File              | 1 KB      |  |                     |
| SWAT+MODFLOW.exe                                    | 9/11/2024 6:06 PM   | Application           | 12,812 KB |  |                     |
| sweep.ops                                           | 6/26/2024 8:20 PM   | OPS File              | 1 KB      |  |                     |
| time.11020000.kst                                   | 6/26/2024 8:20 PM   | Windows Batch File    | 1 KB      |  |                     |

The start of the simulation looks as follows. Notice the message “SWAT+/modflow: modflow is being used”. The model is run for 9 years, as specified in the input file [time.sim](#).

D:\2 Research\2 Projects\5 SWAT+MODFLOW\SWAT+MODFLOW\SWAT+MODFLOW\x64\Debug\SWAT+MODFLOW.exe

```
SWAT+
Revision 61.0
Soil & Water Assessment Tool
PC Version
Program reading . . . executing

Date of Sim 9/12/2024 Time 10:41:53
reading from pet file Time 10:41:53
reading from precipitation file Time 10:41:53
reading from temperature file Time 10:41:53
reading from solar radiation file Time 10:41:54
reading from relative humidity file Time 10:41:55
reading from wind file Time 10:41:55
reading from wgn file Time 10:41:55
reading from wx station file Time 10:41:55
SWAT+/modflow: modflow is being used
Original Simulation 1 1 2000 Yr 1 of 9 Time 10:42: 7
Original Simulation 1 2 2000 Yr 1 of 9 Time 10:42:12
Original Simulation 1 3 2000 Yr 1 of 9 Time 10:42:13
Original Simulation 1 4 2000 Yr 1 of 9 Time 10:42:14
Original Simulation 1 5 2000 Yr 1 of 9 Time 10:42:15
```



During the simulation, messages are written to the file **smrt\_log** to track the reading of smrt files and the calling of subroutines. The file has the following structure:

```

1  log for SWAT+MODFLOW linkage
2
3  operations when reading files...
4
5  reading object.cnt
6  number of MODFLOW objects:      7934
7
8  hyd_connect --> smrt_initialize
9  ▢ reading all smrt connections...
10     reading modflow input files
11     found modflow.obs; reading contents...
12     completed reading modflow input files
13     smrt.hrucells: begin reading
14     smrt.hrucells: finished reading
15     smrt.canalcells: begin reading
16     smrt.canalcells: finished reading
17     smrt.drngcells: begin reading
18     smrt.drngcells: finished reading
19     smrt.resvcells: begin reading
20     smrt.resvcells: finished reading
21     opening groundwater balance output files
22     opening groundwater flux output files
23
24     check if rt3d is active for nutrient transport
25
26     smrt.chancells: begin reading
27     smrt.chancells: create modflow.con
28     smrt.chancells: finished reading
29
30
31
32  ▢ running smrt for time:      2000      1
33     converting variables to modflow
34     running modflow
35     converting to swat+ variables
36     writing output to smrt files
37
38  ▢ running smrt for time:      2000      2
39     converting variables to modflow
40     running modflow
41     converting to swat+ variables
42     writing output to smrt files
43
44  ▢ running smrt for time:      2000      3
45     converting variables to modflow
46     running modflow
47     converting to swat+ variables
48     writing output to smrt files
49
50  ▢ running smrt for time:      2000      4
51     converting variables to modflow
52     running modflow
53     converting to swat+ variables

```

### S5.3 Troubleshooting

The SWAT+MODFLOW can crash for the following main reasons:

- #1: Input files (smrt, modflow) are prepared incorrectly.
- #2: MODFLOW does not converge during a given time step.

For #1: There are many mistakes that can be made when creating the smrt and modflow input files. If the model crashes at the beginning of the simulation (during the read subroutines), you can use the contents of **smrt\_log** to see what the issue might be. The file contents as listed on the previous page can be used as a guide.

For example: if the model crashes and the **smrt\_log** contents are as follows, then there is a problem with the **smrt.hrucells** input file because the message “smrt.hrucells: finished reading” has not been written.

```
1  log for SWAT+MODFLOW linkage
2
3  operations when reading files...
4
5  reading object.cnt
6  number of MODFLOW objects:      7934
7
8  hyd_connect --> smrt_initialize
9  reading all smrt connections...
10     reading modflow input files
11     found modflow.obs; reading contents...
12     completed reading modflow input files
13     smrt.hrucells: begin reading
```

Another example: if the model crashes and the **smrt\_log** contents are as follows, then there is a problem with the MODFLOW input files. In this case, open the main MODFLOW output file (**modflow.out**) and scroll to the bottom of the file. The file will have a message indicating the last procedure performed before crashing. For example, it may read “Reading Recharge file” on the last line, indicating that there is a problem with the Recharge input file.

```
1  log for SWAT+MODFLOW linkage
2
3  operations when reading files...
4
5  reading object.cnt
6  number of MODFLOW objects:      7934
7
8  hyd_connect --> smrt_initialize
9  reading all smrt connections...
10     reading modflow input files
```

For #2: Sometimes the MODFLOW subroutines are not able to solve the groundwater flow equations for the grid cells. This often occurs if inflow/output fluxes are too high, or if model parameters have extreme values. In this case, the model will stop due to convergence issues. In this case, there will be a message in **modflow.out** stating “Stopped due to model convergence error”. To address model convergence, you may need to decrease the grid cell size or relax solver convergence criteria in the Newton solver file **modflow.nwt** (see <https://water.usgs.gov/ogw/modflow-nwt/MODFLOW-NWT-Guide/> for details regarding this file).

## S6. Viewing SWAT+ MODFLOW simulation results

### S6.1 SMRT output files

During the simulation, the model produces a set of output files to view simulated results. SWAT+ output control is handled in the input file `print.prt`. I recommend outputting daily, monthly, yearly, and average annual values for “basin\_wb” (model-wide water balance fluxes), and monthly values for “channel\_sd” (streamflow for each channel).

The following output files are provided by smrt. The subsequent sections show example results using these files.

#### Groundwater head

- `smrt_out_mf_gwhead_mo` monthly average groundwater head (m) for each MODFLOW cell
- `smrt_out_mf_gwhead_yr` yearly average groundwater head (m) for each MODFLOW cell
- `smrt_out_mf_head_obs` daily groundwater head (m) for each observation cell listed in `modflow.obs`

#### Groundwater fluxes:

- Model domain totals (mm)
  - `smrt_out_mf_balance_day` daily flux (mm) for each groundwater term
  - `smrt_out_mf_balance_mo` monthly average flux (mm) for each groundwater term
  - `smrt_out_mf_balance_yr` yearly average flux (mm) for each groundwater term
  - `smrt_out_mf_balance_aa` average annual flux (mm) for each groundwater term
- Cell values (m<sup>3</sup>/day): written for each month and year of the simulation
  - Recharge
    - `smrt_out_mf_rech_mo` monthly average recharge flux for each MODFLOW cell
    - `smrt_out_mf_rech_yr` yearly average recharge flux for each MODFLOW cell
  - Soil Transfer
    - `smrt_out_mf_soil_mo`
    - `smrt_out_mf_soil_yr`
  - Groundwater ET
    - `smrt_out_mf_gwet_mo`
    - `smrt_out_mf_gwet_yr`
  - Groundwater-channel exchange
    - `smrt_out_mf_gwsw_mo`
    - `smrt_out_mf_gwsw_yr`
  - Groundwater pumping for irrigation (based on water allocation module)
    - `smrt_out_mf_wlag_mo`
    - `smrt_out_mf_wlag_yr`
  - Groundwater pumping (specified rates in Well package)
    - `smrt_out_mf_wlwl_mo`
    - `smrt_out_mf_wlwl_yr`
  - Groundwater pumping (specified rates in MNW2 package)
    - `smrt_out_mf_mnw2_mo`
    - `smrt_out_mf_mnw2_yr`
  - Groundwater-canal exchange
    - `smrt_out_mf_canl_mo`
    - `smrt_out_mf_canl_yr`
  - Groundwater-drain exchange
    - `smrt_out_mf_drng_mo`
    - `smrt_out_mf_drng_yr`
  - Groundwater-reservoir exchange
    - `smrt_out_mf_resv_mo`
    - `smrt_out_mf_resv_yr`

## S6.2 Groundwater fluxes

### Domain-wide fluxes

The following figure is a bar chart of groundwater fluxes for each day of the 9-year simulation, as written in the file `smrt_out_mf_balance_day`. The chart was prepared in Excel. Notice that canal seepage occurs only during the days 92-289, as specified in the `smrt.canalcells` file (see Section 2.5 for explanation). Also notice that groundwater pumping occurs only during the growing season of each month, to satisfy the irrigation demand of the crops grown in this study region.

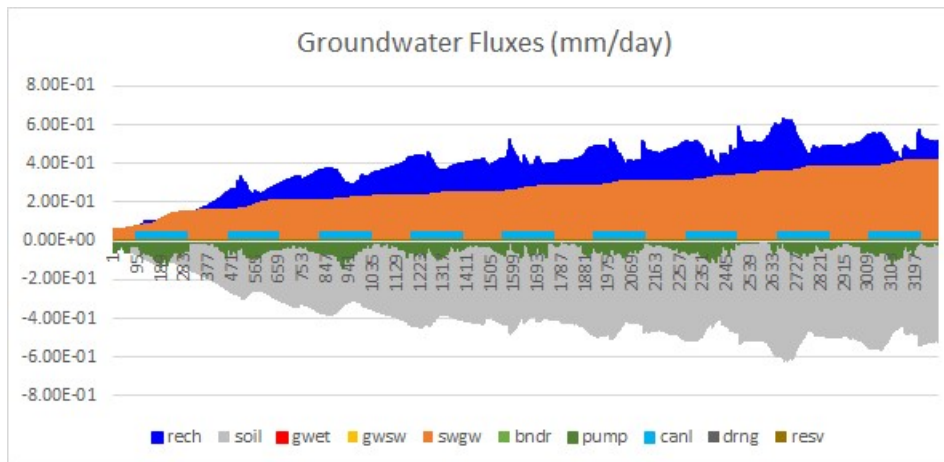

These fluxes can also be tracked in the `modflow.out` file. The groundwater budget (inputs, outputs, storage) is printed for each time step list in the `modflow.oc` input file. For example, for time step (day) 151:

| VOLUMETRIC BUDGET FOR ENTIRE MODEL AT END OF TIME STEP 151, STRESS PERIOD 1 |                |                          |              |
|-----------------------------------------------------------------------------|----------------|--------------------------|--------------|
| CUMULATIVE VOLUMES                                                          |                | RATES FOR THIS TIME STEP |              |
| L**3                                                                        |                | L**3/T                   |              |
| IN:                                                                         |                | IN:                      |              |
| ---                                                                         |                | ---                      |              |
| STORAGE =                                                                   | 214457920.0000 | STORAGE =                | 1187785.1250 |
| CONSTANT HEAD =                                                             | 13318615.0000  | CONSTANT HEAD =          | 98155.4688   |
| WELLS =                                                                     | 0.0000         | WELLS =                  | 0.0000       |
| DRAINS =                                                                    | 0.0000         | DRAINS =                 | 0.0000       |
| RIVER LEAKAGE =                                                             | 3008343.7500   | RIVER LEAKAGE =          | 48614.9414   |
| ET =                                                                        | 0.0000         | ET =                     | 0.0000       |
| RECHARGE =                                                                  | 31732408.0000  | RECHARGE =               | 264992.4062  |
| RESERV. LEAKAGE =                                                           | 1352106.7500   | RESERV. LEAKAGE =        | 8885.7314    |
| TOTAL IN =                                                                  | 263869392.0000 | TOTAL IN =               | 1608433.7500 |
| OUT:                                                                        |                | OUT:                     |              |
| ---                                                                         |                | ---                      |              |
| STORAGE =                                                                   | 201904832.0000 | STORAGE =                | 857059.0000  |
| CONSTANT HEAD =                                                             | 9794827.0000   | CONSTANT HEAD =          | 54743.3086   |
| WELLS =                                                                     | 51451796.0000  | WELLS =                  | 675977.9375  |
| DRAINS =                                                                    | 484526.8438    | DRAINS =                 | 16433.4629   |
| RIVER LEAKAGE =                                                             | 38360.6562     | RIVER LEAKAGE =          | 2934.8552    |
| ET =                                                                        | 0.0000         | ET =                     | 0.0000       |
| RECHARGE =                                                                  | 0.0000         | RECHARGE =               | 0.0000       |
| RESERV. LEAKAGE =                                                           | 194016.0000    | RESERV. LEAKAGE =        | 1285.0757    |
| TOTAL OUT =                                                                 | 263868368.0000 | TOTAL OUT =              | 1608433.7500 |
| IN - OUT =                                                                  | 1024.0000      | IN - OUT =               | 0.0000       |
| PERCENT DISCREPANCY =                                                       | 0.00           | PERCENT DISCREPANCY =    | 0.00         |

Inputs include channel seepage, recharge, reservoir seepage, and boundary inflow; outputs include well pumping, drains, discharge to channels, discharge to reservoirs, and boundary outflow.

If the groundwater→soil transfer option is turned off (see Section 2.1 and input file smrt.hrucells, line 6), then the daily groundwater fluxes are as follows:

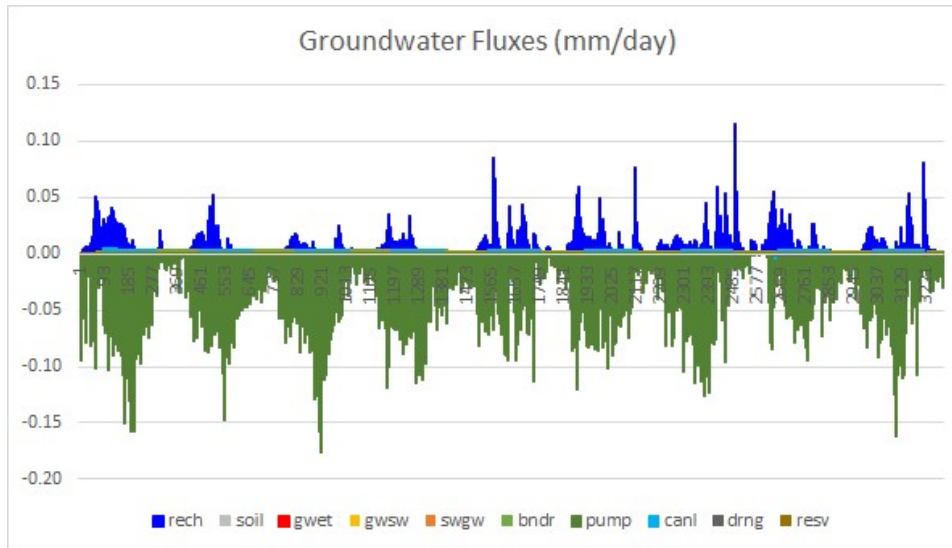

Notice that the recharge fluxes are much lower than in the case where the option is turned on (see chart on previous page). When the groundwater→soil transfer option is turned on, water is transferred to the soil profile, which then often returns to the aquifer via soil deep percolation; and the cycling can repeat. When the option is turned off, flow is only in the direction from the soil profile to the water table.

## Cell fluxes

### **Recharge**

The following figure shows monthly average recharge flux ( $\text{m}^3/\text{day}$ ) for each MODFLOW cell for July 2008, as written in the file `smrt_out_mf_rech_mo`. The map was created using an ASCII file, read into QGIS as a raster. The example file `rech_2008_07.txt` is available in the folder “Maps”. The maximum cell value is  $57,512 \text{ m}^3/\text{day}$ , shown in red.

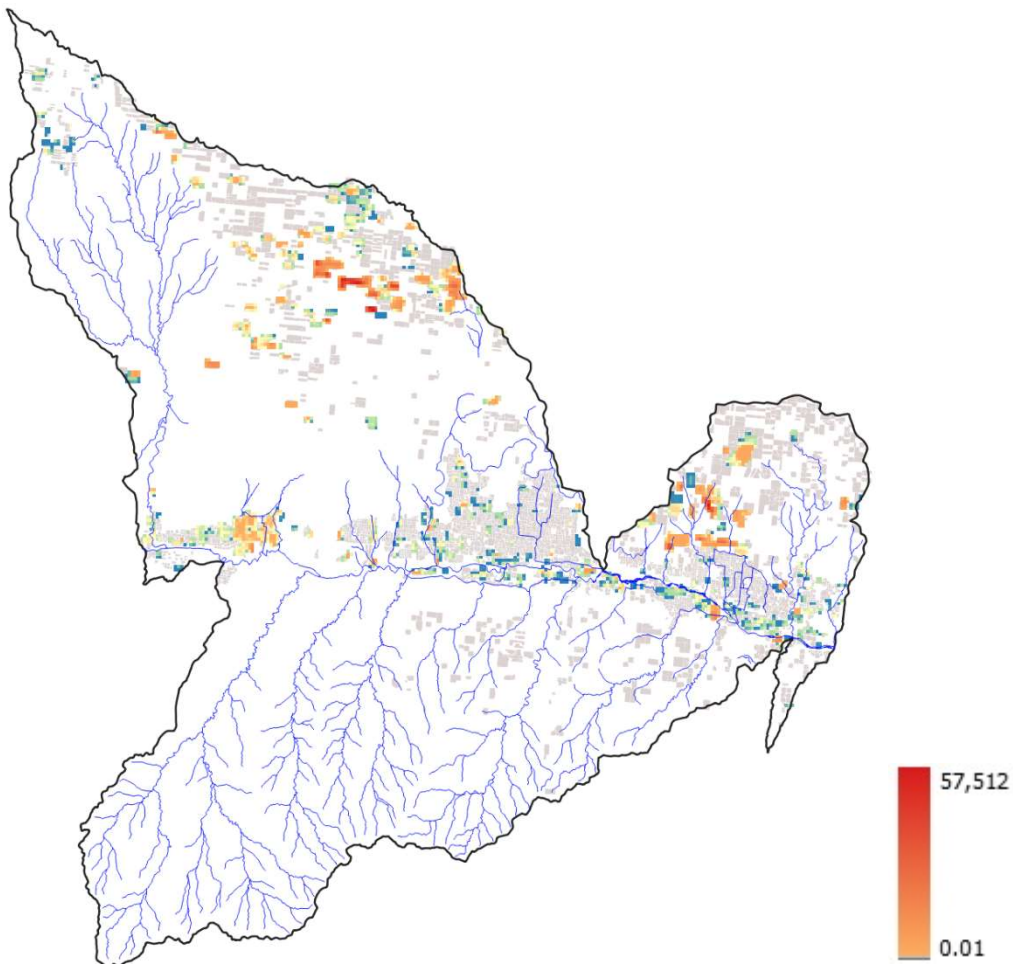



When the groundwater→soil transfer option is turned off, then recharge only happens where soil deep percolation occurs (and not in areas of high water table where groundwater is transferred to the soil profile, and then returned to the water table via percolation).

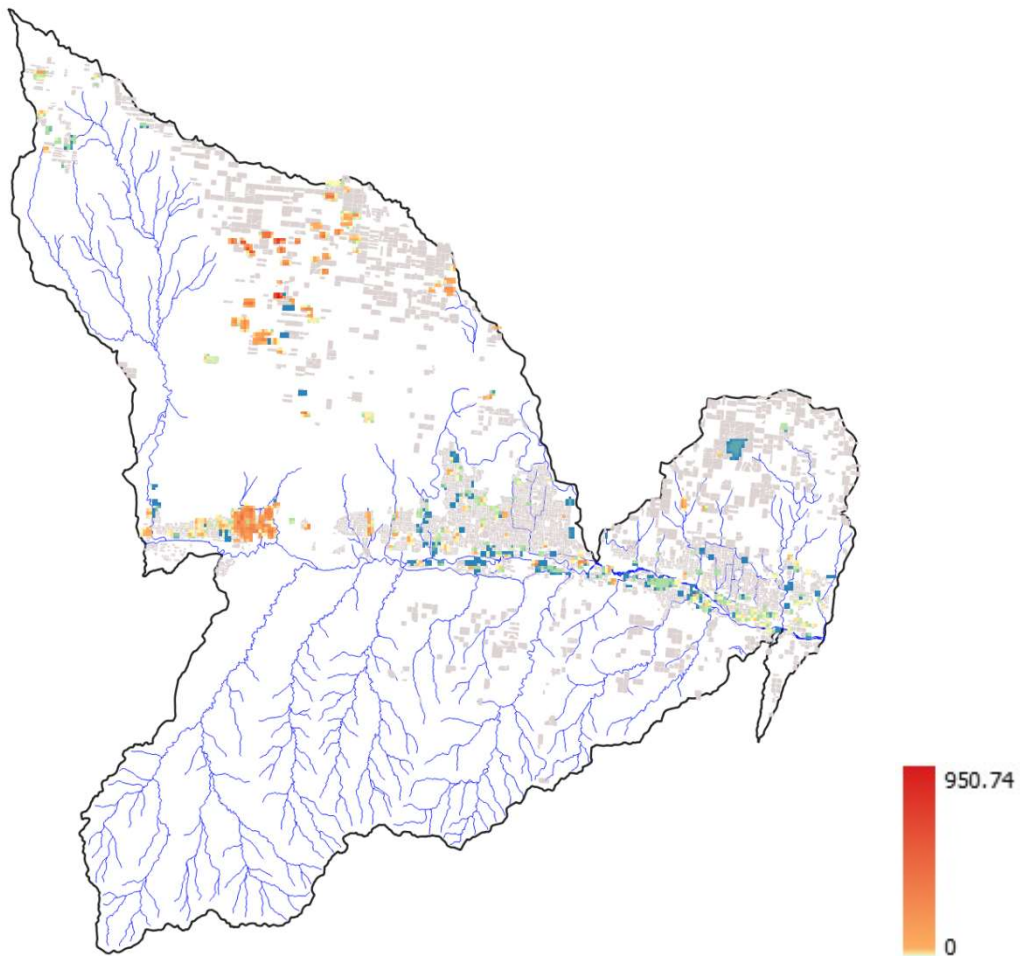

### Pumping for Irrigation

The following figure shows monthly average pumping flux ( $\text{m}^3/\text{day}$ ) for each MODFLOW cell for July 2008, as written in the file `smrt_out_mf_pump_mo`. The map was created using an ASCII file, read into QGIS as a raster. The example file `pump_2008_07.txt` is available in the folder “Maps”. Notice that pumping occurs on the east side of the region, where the majority of groundwater-irrigated fields reside. The maximum cell value is  $-4,054 \text{ m}^3/\text{day}$  (negative because groundwater is being removed from the aquifer), shown in red.

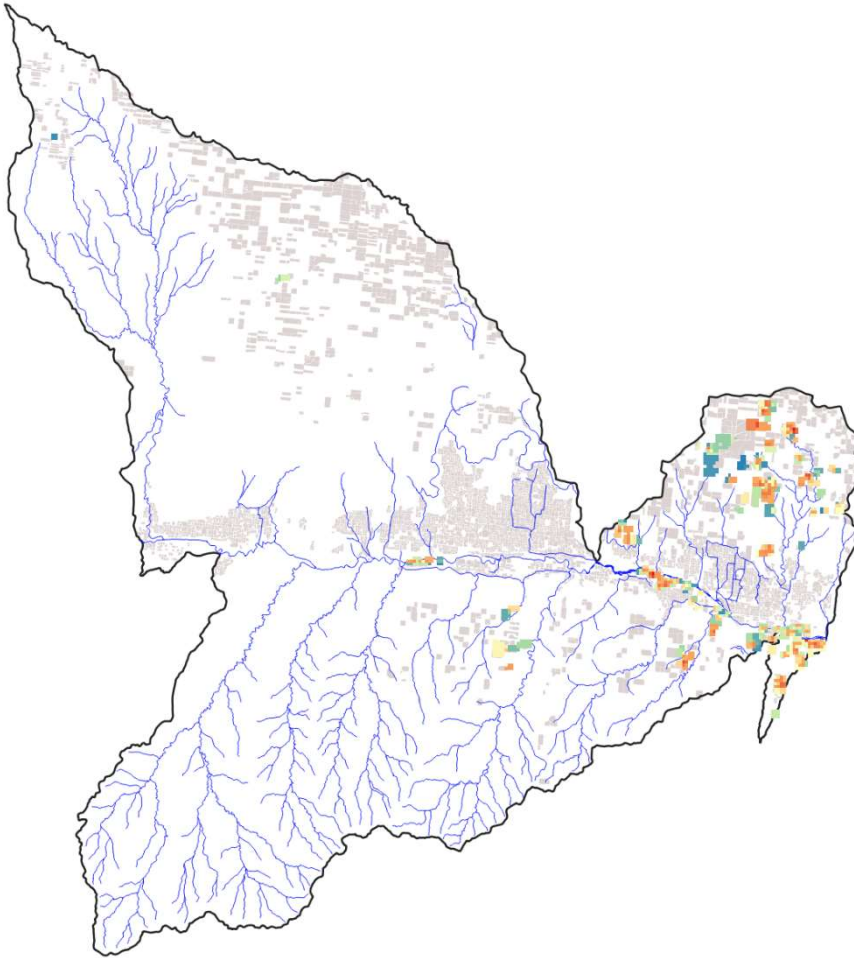



### Groundwater-canal exchange

Monthly average groundwater-canal flux (positive value = canal seepage) ( $\text{m}^3/\text{day}$ ) for each MODFLOW cell for July 2008, as written in the file `smrt_out_mf_canl_mo`. The map was created using an ASCII file, read into QGIS as a raster. Red-orange colors indicate locations of canal seepage (inflow to aquifer); blue-green colors indicate groundwater discharge to canals (outflow from aquifer). The example file `canal_2008_07.txt` is available in the folder “Maps”.

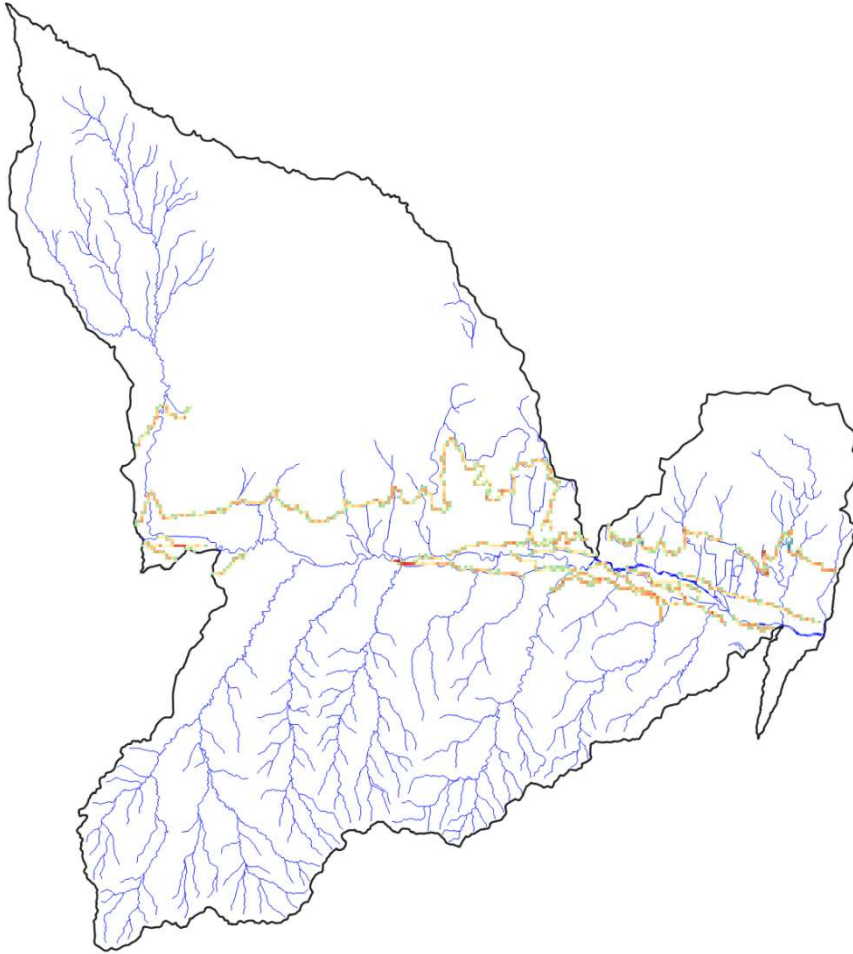

### S6.3 Groundwater head

Maps of cell-by-cell groundwater head (m) can be plotted using the output in `modflow.hed` (for days specified in `modflow.oc`), `smrt_out_mf_gwhead_mo`, and `smrt_out_mf_gwhead_yr`. The following map shows average groundwater head for each grid cell for July 2008. The map was created using an ASCII file, read into QGIS as a raster. The example file `gwhead_2008_07.txt` is available in the folder “Maps”.

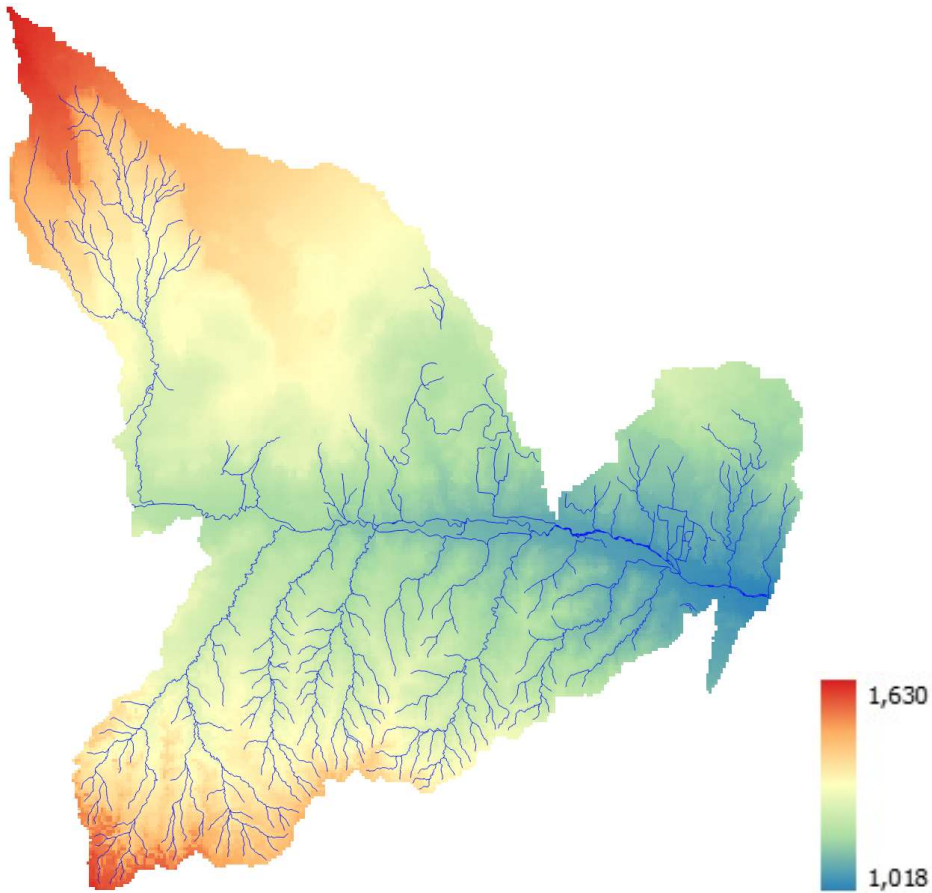

## S7. Model calibration using PEST

Model calibration (i.e. parameter estimation) can be performed for the SWAT+ model using the PEST (Parameter Estimation) (Doherty, 2020) software. PEST is model-independent and has been used in hundreds of hydrologic and environmental modeling studies to provide optimal estimates of parameter values. PEST uses nonlinear techniques to minimize the residual between observed and simulated values.

The following diagram shows the overall workflow of a PEST simulation. PEST starts with an initial set of parameter values, and then during each iteration is run  $n$  times ( $n$  = number of targeted parameters) to populate the Jacobian matrix, which contains derivatives of each simulated value, i.e., the change in the simulated value with respect to the model parameter value, an indication of the relative influence of each parameter on model output. The matrix values are then used to provide an improved set of parameter values during the next iteration, with this process continuing until the sum of the residuals between observed and simulated values is minimized.

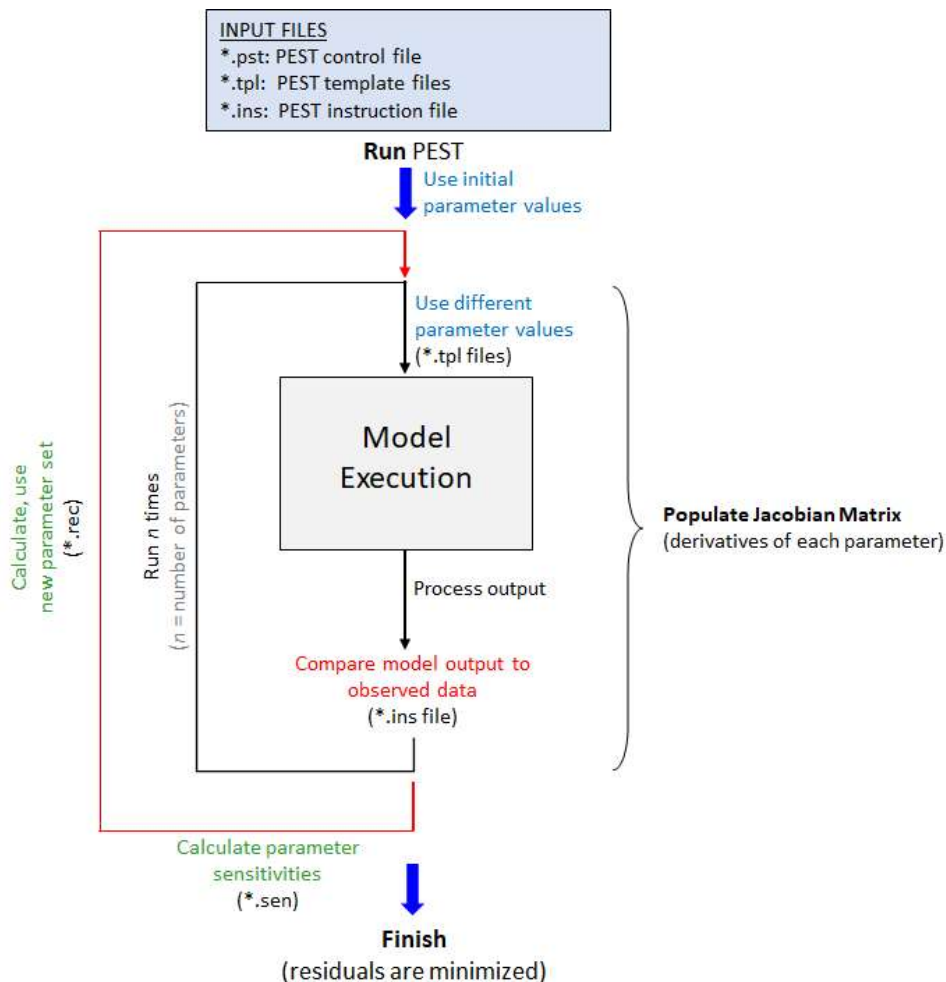

For the JMR model, all PEST files are contained in the folder [PEST\Results\Regular](#). These are referenced on the next page. For details on how to set up PEST for a hydrologic model, please view the tutorial videos and PEST manuals available in the folder [PEST\Video tutorials](#). These videos were prepared for a different SWAT+ model, but the steps and set-up to run PEST are the same. You should start by viewing Videos 1-9.

There are three main types of files that need to be created to run a PEST simulation:

1. **\*.pst file.** This is the “control” files that lists targeted model parameters, parameter ranges, measurement data, and PEST calibration parameters. For the JMR model, the file is called [pest\\_control.pst](#). For this model, there are 67 parameters included in the model calibration. There are 241 measured data: 84 monthly streamflow measurements from an upstream river gage; 84 monthly streamflow measurements from a downstream river gage; and 73 annual groundwater head measurements from 10 monitoring wells.
2. **\*.tpl files.** These are the “template” files. There is one template file for each SWAT+ input file that contains one or more targeted parameters. These files contain placeholders for targeted parameters, which will be filled in by PEST during model executions. For the JMR model, the 67 parameters are contained within 10 input file (hydrology, snow, soil, curve number, aquifer properties, groundwater delay, channel bed conductivity, and canal bed conductivity).
3. **\*.ins file:** This is the “instruction” file that informs PEST how to read model output, for comparison with measurement data.

#### Basic procedure:

1. Create template files for the required input files (e.g., [cntable.lum](#), [hydrology.hyd](#), [modflow.upw](#))
2. Create the control file for PEST (e.g., [pest\\_control.pst](#)); use the file [pest\\_control.explanation](#) as a guide to create the control file. For our example watershed, we have 67 parameters (these will be varied during the calibration) and 241 measured values. For our example watershed, the calibration period 2002-2008.
3. When PEST runs, it will compare model output with the observed values listed in the PEST control file.
  - a. Model output values will be stored in a file called “[pest\\_sim\\_output](#)”, as specified at the bottom of the PEST control file (the user decides what this file is called). The [pest\\_sim\\_output](#) file must be accompanied by an instruction file ([pest\\_sim\\_output.ins](#)), so that PEST knows how to interpret the values listed in [pest\\_sim\\_output](#).
  - b. After SWAT+MODFLOW finishes the simulation, a post-processing code must be run that retrieves the simulated values from output files and writes them to the file [pest\\_sim\\_output](#). For the JMR model, this post-processing step is performed by the Fortran program [pest\\_sim\\_output.exe](#). (*Note: any post-processing program could be created for this purpose; this Fortran program is one option; the Fortran code (create\_sim\_output.f) is available in the folder [PEST](#)*)
  - c. The 2 steps of 1) running SWAT+MODFLOW; 2) running [pest\\_sim\\_output.exe](#) to create the [pest\\_sim\\_output](#) file, are contained in the batch file [run.bat](#). This batch file is listed in the PEST control file, under “*model command line*”, so that PEST will run both the SWAT+MODFLOW executable and the post-processing program for each simulation run.
  - d. The program [pest\\_sim\\_output.exe](#) needs to know the channel to target for output, the number of months for output, and the list of monitoring wells. For our example with the JMR model, this information is provided in the input file [pest\\_targets](#). This file is specific to the post-processing code, and can change based on the format of your own post-processing code.
4. When all PEST files are ready, we will run a check program ([pestchek.exe](#)) to verify that all input files are correctly written. Using the Command Prompt, navigate to the folder, and type **pestchek**, followed by the name of the PEST control file (in our example, [pest\\_control.pst](#)):

```
Command Prompt
Microsoft Windows [Version 10.0.19045.4894]
(c) Microsoft Corporation. All rights reserved.

U:\>d:

D:\>cd D:\2 Research\2 Projects\5 SWAT+MODFLOW\Tutorial\PEST\Results\Regular

D:\2 Research\2 Projects\5 SWAT+MODFLOW\Tutorial\PEST\Results\Regular>pestchk pest_control

PESTCHEK Version 17.05. Watermark Numerical Computing.

Errors ----->
No errors encountered.

Warnings ----->
No warnings.

D:\2 Research\2 Projects\5 SWAT+MODFLOW\Tutorial\PEST\Results\Regular>
```

For our example, with the provided files, there should be no errors.

5. Run PEST from the Command Prompt, by typing **pest**, followed by the name of the PEST control file. PEST will then begin its iterations. For each iteration, PEST will run SWAT+MODFLOW (and the post-processing code [pest\\_sim\\_output.exe](#)) one time for each parameter. At the conclusion of each iteration, PEST modifies the parameter values to minimize the residual between observed and simulated values.
  - a. To monitor progress, view the contents of [pest\\_control.rec](#). This file contains updates of the total residual (“phi”) between the observed values and the simulated values. This value should decrease with each iteration, as parameter values are modified.
  - b. The sensitivity of model output to each parameter is contained in the output file [pest\\_control.sen](#). This provides a local sensitivity analysis of each parameter in regard to the model output.

## S8. Global sensitivity analysis for SWAT+MODFLOW

SWAT+MODFLOW models can be used in conjunction with the PEST++ software program to perform global sensitivity analysis (GSA) using the Morris Method. This requires the use of PEST++ (executable: [pestpp-sen.exe](#)), which is provided in the folder [PEST\Results\1 Morris Simulation \(Q+GW\)\GSA SWAT+MOD\GSA SWAT+MOD](#).

The PEST files and post-processing code are the same as for regular model calibration (see Section 8). When running PEST++, use the executable [pestpp-sen.exe](#) in the command window. For our JMR model, this will run the SWAT+MODFLOW model 271 times [(number of parameters = 67 \* 4) + 4]. Once the runs are complete, PEST++ writes out several files containing sensitivity information:

**\*.sen.par.csv**: List of parameter values for each simulation.

**\*.mio**: Sensitivity values (absolute value of mean; standard deviation) of each model output to each parameter. For the JMR model, this results in sensitivity values for each parameter, for each of the 241 simulated values that correspond to the measured values. These results can be used to identify the controlling parameters on each individual model output. This can be helpful to identify controlling parameters for different seasons of the year, or for different locations within the watershed.

**\*.mos**: Same as the results in **\*.mio** but sorted by parameter.

**\*.msn**: Overall sensitivity of model output to parameters. This provides a single sensitivity value for each parameter, therefore combining the effect on all measured values.

**\*.group.msn**: Overall sensitivity of model output to parameters for each model output type. For the JMR model, this results in parameter sensitivity values for the first streamflow gage ([flow 1](#)), the second streamflow gage ([flow 2](#)), and groundwater head ([gw head](#)).

For example, the following is a bar chart showing the absolute value of mean sensitivity for the 67 parameters, in relation to flow 1, as provided in **\*.group.msn**:

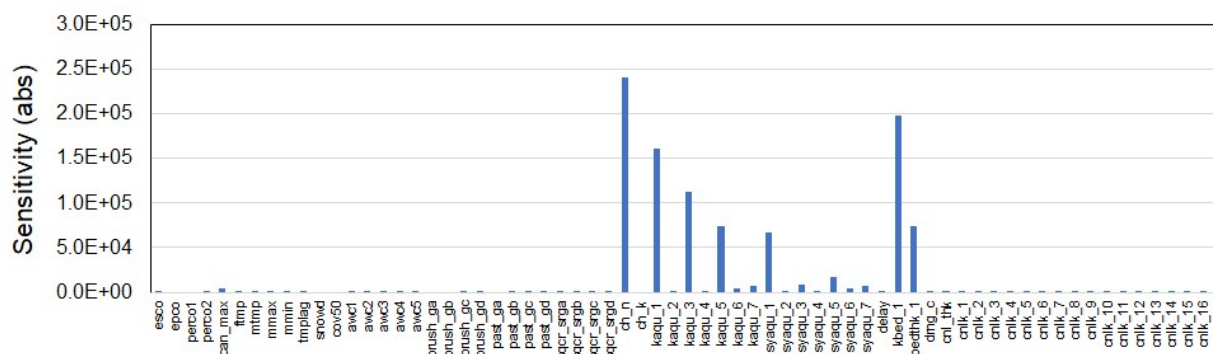

From these results, we conclude that stream channel Manning's roughness (ch\_n), aquifer hydraulic conductivity in geologic zones 1, 3, and 5 (kaqu\_1, kaqu\_3, kaqu\_5), specific yield in zone 1 (syaqu\_1), channel bed conductivity (kbed\_1), and channel bed thickness (bedthk\_1) control streamflow in the downstream region of the model. This is an expected result, as groundwater discharge to the Arkansas River is a significant component of streamflow in the JMR watershed.



These results, along with the results for flow 2 and gw\_head, are shown in the following table, with red colors denoting strong parameter control, and green indicating weak parameter control. The results for flow 2 and gw\_head are similar to those for flow 1, with Manning's roughness, aquifer hydraulic conductivity in zones 1, 3, 5, specific yield in zone 1, and channel bed conductivity and thickness controlling streamflow and groundwater head.

| parameter | Mean (absolute)<br>flow 1 | Mean (absolute)<br>flow 2 | Mean (absolute)<br>gw head | Definition               |
|-----------|---------------------------|---------------------------|----------------------------|--------------------------|
| esco      | 1595                      | 24251                     | 14                         |                          |
| epco      | 0                         | 0                         | 0                          |                          |
| perco1    | 0                         | 0                         | 0                          |                          |
| perco2    | 273                       | 17098                     | 6                          |                          |
| can_max   | 3832                      | 70138                     | 40                         |                          |
| ftmp      | 159                       | 415                       | 2                          |                          |
| mtmp      | 84                        | 1356                      | 1                          |                          |
| mmax      | 108                       | 1228                      | 0                          |                          |
| mmin      | 387                       | 1326                      | 4                          |                          |
| tmplag    | 39                        | 376                       | 1                          |                          |
| snowd     | 0                         | 0                         | 0                          |                          |
| oov50     | 0                         | 0                         | 0                          |                          |
| awc1      | 21                        | 77                        | 0                          |                          |
| awc2      | 234                       | 297                       | 4                          |                          |
| awc3      | 292                       | 1412                      | 6                          |                          |
| awc4      | 117                       | 1073                      | 1                          |                          |
| awc5      | 25                        | 965                       | 0                          |                          |
| brush_ga  | 0                         | 0                         | 0                          |                          |
| brush_gb  | 0                         | 0                         | 0                          |                          |
| brush_gc  | 11                        | 10                        | 0                          |                          |
| brush_gd  | 17                        | 32                        | 0                          |                          |
| past_ga   | 0                         | 0                         | 0                          |                          |
| past_gb   | 7                         | 26                        | 0                          |                          |
| past_gc   | 420                       | 3398                      | 2                          |                          |
| past_gd   | 444                       | 715                       | 2                          |                          |
| sqcr_srqa | 0                         | 1                         | 0                          |                          |
| sqcr_srgb | 13                        | 57                        | 0                          |                          |
| sqcr_srgc | 161                       | 994                       | 1                          |                          |
| sqcr_srgd | 16                        | 49                        | 0                          |                          |
| ch_n      | 24188                     | 14698200                  | 72665                      | Manning's roughness      |
| ch_k      | 0                         | 0                         | 0                          |                          |
| kaqu_1    | 160589                    | 5469790                   | 26135                      | K of zone 1              |
| kaqu_2    | 2154                      | 37241                     | 1341                       |                          |
| kaqu_3    | 112723                    | 3321230                   | 16149                      | K of zone 3              |
| kaqu_4    | 4                         | 5                         | 50                         |                          |
| kaqu_5    | 74203                     | 6328520                   | 23303                      | K of zone 5              |
| kaqu_6    | 4050                      | 296327                    | 1141                       |                          |
| kaqu_7    | 6650                      | 161470                    | 504                        |                          |
| syaqu_1   | 67131                     | 2468600                   | 20034                      | Specific Yield of zone 1 |
| syaqu_2   | 478                       | 72560                     | 218                        |                          |
| syaqu_3   | 8951                      | 7478                      | 9322                       |                          |
| syaqu_4   | 1                         | 1327                      | 61                         |                          |
| syaqu_5   | 17459                     | 1390500                   | 4873                       |                          |
| syaqu_6   | 4946                      | 436167                    | 316                        |                          |
| syaqu_7   | 7274                      | 718027                    | 1865                       |                          |
| delay     | 2                         | 92                        | 1                          |                          |
| kbed_1    | 198768                    | 11235400                  | 92203                      | Channel bed conductivity |
| bedthk_1  | 74755                     | 362672                    | 38286                      | Channel bed thickness    |
| drng_c    | 23                        | 30                        | 59                         |                          |
| cnl_thk   | 978                       | 2045                      | 2115                       |                          |
| cnlk_1    | 2                         | 2                         | 0                          |                          |
| cnlk_2    | 693                       | 907                       | 889                        |                          |
| cnlk_3    | 103                       | 910                       | 472                        |                          |
| cnlk_4    | 0                         | 0                         | 2                          |                          |
| cnlk_5    | 0                         | 0                         | 0                          |                          |
| cnlk_6    | 0                         | 0                         | 0                          |                          |
| cnlk_7    | 157                       | 209                       | 102                        |                          |
| cnlk_8    | 1                         | 4                         | 7                          |                          |
| cnlk_9    | 89                        | 178                       | 371                        |                          |
| cnlk_10   | 71                        | 120                       | 250                        |                          |
| cnlk_11   | 6                         | 38                        | 131                        |                          |
| cnlk_12   | 121                       | 209                       | 263                        |                          |
| cnlk_13   | 5                         | 418                       | 90                         |                          |
| cnlk_14   | 1                         | 223                       | 55                         |                          |
| cnlk_15   | 2                         | 176                       | 72                         |                          |
| cnlk_16   | 1                         | 15                        | 40                         |                          |
| cnlk_17   | 2                         | 5                         | 10                         |                          |

## References

- Doherty, J.: PEST, Model-independent Parameter Estimation: User Manual (seventh ed.). Watermark Numerical Computing, Brisbane, Australia, 3338, 3349, 2020.
- Niswonger, R.G., Panday, S. and Ibaraki, M., 2011. MODFLOW-NWT, a Newton formulation for MODFLOW-2005. US Geological Survey Techniques and Methods, 6(A37), p.44.
